# Young transposable elements rewired gene regulatory networks in human and chimpanzee hippocampal intermediate progenitors

Sruti Patoori<sup>1</sup>, Samantha Barnada<sup>1</sup>, and Marco Trizzino<sup>1,\*</sup>

<sup>1</sup> Department of Biochemistry and Molecular Biology, Sidney Kimmel Medical College, Thomas Jefferson University, Philadelphia, PA

\* Corresponding author: Marco Trizzino, Department of Biochemistry and Molecular Biology, Sidney Kimmel Medical College, Thomas Jefferson University, 233 S 10<sup>th</sup> Street, BLSB 826, Philadelphia, PA, 19104. E-mail: [marco.trizzino@jefferson.edu](mailto:marco.trizzino@jefferson.edu)

## Abstract

The hippocampus is associated with essential brain functions such as learning and memory. Human hippocampal volume is significantly greater than expected when compared to non-human apes, suggesting a recent expansion. Intermediate progenitors, which are able to undergo multiple rounds of proliferative division before a final neurogenic division, may have played a role in the evolutionary hippocampal expansion. To investigate the evolution of gene regulatory networks underpinning hippocampal neurogenesis in apes, we leveraged the differentiation of human and chimpanzee induced Pluripotent Stem Cells into TBR2-positive hippocampal intermediate progenitors (hIPCs). We find that the gene networks active in hIPCs are significantly different between humans and chimpanzees, with ~2,500 genes differentially expressed. We demonstrate that species-specific transposon-derived enhancers contribute to these transcriptomic differences. Young transposons, predominantly Endogenous Retroviruses (ERVs) and SINE-Vntr-Alus (SVAs), were co-opted as enhancers in a species-specific manner. Human-specific SVAs provided substrates for thousands of novel TBR2 binding sites, and CRISPR-mediated repression of these SVAs attenuates the expression of ~25% of the genes that are upregulated in human intermediate progenitors relative to the same cell population in the chimpanzee.

**Summary statement:** Evolution of human and chimpanzee hippocampal development was mediated by co-option of young retrotransposons into species-specific enhancers.

**Key words:** hippocampal development, transposable elements, iPSCs, intermediate progenitors, TBR2, SVAs

## Introduction

The hippocampus is associated with many traits relevant in the context of human evolution. These include traits such as tool use and language which require social cognition and learning, as well as spatial memory, navigation, and episodic memory (Burgess et al., 2002; Eichenbaum, 2017a; Eichenbaum, 2017b; Squire, 1992; Tomasello and Herrmann, 2010). This region of the brain is also greatly affected by Alzheimer's Disease (AD), a neurodegenerative disorder characterized by cell death, plaques and tangles of misfolded proteins, and cognitive decline (Duyckaerts et al., 2009). It has been hypothesized that the cognitive AD phenotype is uniquely human and that non-human primates, including chimpanzees, do not exhibit AD-related dementia (Edler et al., 2017; Finch and Austad, 2015; Walker and Jucker, 2017). If humans are uniquely susceptible to AD, it is crucial to understand how the human hippocampus differs from that of our closest biological relatives, the chimpanzees.

Human hippocampal volume is 50% greater than expected when compared to the hippocampal volumes of non-human apes, possibly indicating a recent hippocampal expansion specific to the human lineage (Barger et al., 2014). However, the evolution of the human hippocampus and the developmental mechanisms driving the human-specific volume increase have not yet been thoroughly studied.

Recent studies have suggested that evolutionary changes to neuronal progenitors may have had an impact on cortical volume in primates by increasing proliferative potential (Martínez-Cerdeño et al., 2006; Rétaux et al., 2013; Florio and Huttner, 2014). A specific class of neuronal progenitors known as intermediate progenitor cells (IPCs) or "transit amplifying cells" are able to undergo multiple rounds of proliferative division before a final neurogenic division (Englund, 2005; Arnold et al., 2008; Pontious et al., 2008; Hevner, 2019). These cells express the neurodevelopmental transcription factor TBR2 (EOMES) and are found in the sub-ventricular zone of the developing neocortex and hippocampus (Bulfone et al., 1999; Kimura et al., 1999; Englund, 2005; Cipriani et al., 2016). Genetic ablation of TBR2 in these progenitors results in reduced cortical thickness in mice (Sessa et al., 2008), abnormal cortical cell differentiation (Mihalas et al., 2016), and impaired neurogenesis in the hippocampal formation (Hodge et al., 2012). As these IPCs are hypothesized to play a role in neocortical expansion, they may also be involved in the lineage-specific hippocampal expansion seen in humans.

Many of the differences between humans and chimpanzees are due to diverging gene regulatory sequences (Agoglia et al., 2021; Enard et al., 2002; Gokhman et al., 2021; King and Wilson, 1975; Wray, 2007). A recent study comparing gene expression between adult human, chimpanzee and macaque brain regions identified several genes specifically upregulated in the human hippocampus (Sousa et al., 2017). However, transcriptomic differences between primate species during specific timepoints of hippocampal development have not been investigated.

As samples of developing human and chimpanzee brain tissue are extremely limited, Induced Pluripotent Stem Cells (iPSCs) are an ideal system to conduct comparative studies of human and chimpanzee hippocampal development. Previous studies have employed iPSC-derived cortical organoids and iPSC-derived neuronal progenitor cells (NPCs) from human and chimpanzee for comparative and developmental genomic purposes (Marchetto et al., 2019; Mora-Bermúdez et al., 2016). Here, we leverage human and chimpanzee iPSC-derived hippocampal progenitors as models for comparative developmental and genomic studies with the goal of identifying species-specific differences in gene regulation during hippocampal development.

Several recent papers have recently demonstrated that transposable elements (TEs) can alter existing regulatory elements or generate entirely novel ones, as well as expand in a species- or lineage-specific manner (reviewed in Sundaram and Wysocka, 2020). Species-specific TE expansion and co-option into gene regulatory networks have been demonstrated as a mechanism for evolutionary change (Chuong et al., 2016; Fuentes et al., 2018; Jacques et al., 2013; Lynch et al., 2011; Lynch et al., 2015; Miao et al., 2020; Mika et al., 2021; Pontis et al., 2019; Trizzino et al., 2017). Endogenous Retroviruses (ERVs)

and SINE-Vntr-Alus (SVAs) are among the TE families more frequently associated with gene regulatory activity in the human genome (Chuong et al., 2016; Fuentes et al., 2018; Pontis et al., 2019; Trizzino et al., 2017; Trizzino et al., 2018). SVAs encompass six subfamilies, denoted as SVA-A through -F. Of the ~3,000 SVA copies in the human genome, nearly half are human specific, including all the SVA-E and SVA-F (Quinn and Bubb, 2014; Wang et al., 2005). The remaining half are also found in other great apes. SVAs are still replication competent and thus able to transpose in the human genome. ERVs are retrotransposons belonging to the Long Terminal Repeat (LTR) group. They are remnants of past retroviral infection events, and make up ~8% of the human genome (Tokuyama et al., 2018). Both SVAs and ERVs were recently found to be enriched within the sequences of active cis-regulatory elements (enhancers, promoters) in hippocampal tissue as compared to other human brain regions where they are predominantly repressed (Trizzino et al., 2018). Therefore, we hypothesize that species-specific ERV and SVA transposon activity may influence the gene regulatory networks necessary for human and chimpanzee hippocampal development.

Given the key function that intermediate progenitors played in the evolution of the primate brain (Florio and Huttner, 2014; Martínez-Cerdeño et al., 2006), we sought to identify molecular differences between iPSC-derived human and chimpanzee hippocampal intermediate progenitors (hIPCs) in terms of gene expression and the regulatory activity of non-coding regions. We specifically examined gene expression (RNA-seq), gene regulation (ATAC-seq) and functional TE activity via CRISPR-interference.

After confirming that the hIPC differentiated cells express the appropriate neurodevelopmental markers, we conducted a transcriptomic comparison between human and chimpanzee hIPCs. This analysis revealed over 2,500 differentially expressed genes. We then used ATAC-seq to conduct extensive analyses of differential chromatin accessibility between human and chimpanzee hIPCs. In both species, differentially accessible chromatin regions were more likely than expected to overlap a TE insertion. Further, these regions were found as both enriched and depleted for specific TE families. Notably, species-specific enrichment for ERV and SVA sequences within differentially accessible genomic sites correlated with species-specific changes in nearby gene expression. This is likely driven by transcription factors binding to the TE-derived regulatory sequences, as we demonstrate for TBR2 and SVA-derived enhancers. Finally, we used CRISPR-interference to repress all the accessible SVAs in progenitor-like cells and demonstrated that such repression results in global changes in gene expression and affects hundreds of important neurodevelopmental genes.

This work demonstrates that two young TE families have contributed significantly to the gene regulatory differences between human and chimpanzee hippocampal development, providing insight into how the human hippocampus evolved both its unique cognitive capacity and its susceptibility to neurodegenerative disease.

## Results

### An iPSC-derived model for human and chimpanzee hippocampal intermediate progenitors

We modeled hIPCs in humans and chimpanzees using three human and three chimpanzee iPSC lines. All six iPSC lines were validated as pluripotent in previous studies (Gallego Romero et al., 2015; Pagliaroli et al., 2021; Pashos et al., 2017; Ward et al., 2018; Yang et al., 2015; Zhang et al., 2015). For both human and chimpanzee iPSCs, we used two female cell lines and one male line.

We used a previously published method to generate hIPCs from iPSCs (Yu et al., 2014). In this protocol, the stem cells are treated with a media containing anticaudalizing factors and a Sonic Hedgehog antagonist (DKK1, Nogging, SB431542) to generate forebrain progenitor cell types (Yu et al., 2014). It should be noted that the hIPCs are distinct from a more general neuronal progenitor cell (pan-NPC) as the pan-NPC media is supplemented only with FGF2 and B27. Moreover, and the hIPCs can be further

induced to generate mature hippocampal CA3 pyramidal or dentate gyrus granule neurons (Sarkar et al., 2018; Yu et al., 2014).

As we were specifically interested in TBR2-positive intermediate hippocampal progenitors, we first differentiated one of the human lines for five days and performed a TBR2 time-course western blot on cells collected at day 0, day 5 and day 11. The blot revealed day-5 as a time-point in which TBR2 protein is highly expressed (Fig. 1A).

To confirm that day 5 was the optimal time-point in both species, we differentiated one human and one chimpanzee line for five days and used immunocytochemistry to confirm the presence of OTX2, which labels neuronal progenitors, as well as TBR2 and PAX6 which specifically mark the intermediate progenitor cell type (Florio and Huttner, 2014; Hevner, 2019; Fig. 1B). A previous study of human fetal hippocampal development demonstrated that 47% and 57% of TBR2-positive cells express PAX6 at gestational weeks 11 and 13, respectively (Cipriani et al., 2016). We found that nearly all of the cells treated with hPIPC media for five days were positive for all three neurodevelopmental markers in both species (Fig. 1B). Together, these data indicate that our iPSC-derived model is suitable to study TBR2-positive hippocampal intermediate progenitors in both human and chimpanzee.

### **Important neurodevelopmental genes are differentially expressed between human and chimpanzee hippocampal intermediate progenitors**

To investigate the differences between human and chimpanzee hippocampal intermediate progenitors, we first aimed to characterize differential gene expression between the hPIPCs of the two species. After five days of treatment with the hPIPC differentiation media, we collected cells for RNA extraction (Fig. 2A). To ensure statistical power, we conducted bulk RNA-seq on two replicates each of all six cell lines (i.e. three biological replicates and six technical replicates per species). The differentiation, the harvesting, and the RNA processing were performed in mixed batches with samples from both species to prevent batch effects. The libraries were sequenced using Illumina NextSeq500, generating 100 bp Paired-End reads. Non-orthologous genes were omitted from the analysis and a total of 2,588 genes were identified as differentially expressed (FDR <0.05 and log2foldChange > 1.5 or < -1.5). The genes with log2foldChange > 1.5 were more highly expressed in the human hPIPCs ("Human UP") while the genes with log2foldChange < -1.5 were more highly expressed in the chimpanzee hPIPCs ("Chimp UP"). In total, 1,686 (65.1%) of the differentially expressed genes (DEG) were "Human UP" and 901 (34.9%) of the DEG were "Chimp UP" genes (Fig. 2B, Supplementary Table 1.1).

Hippocampal neurodevelopmental markers *PAX6*, *OTX2*, *NEUROD1* and *FOXP1* were found as highly expressed in both species. This is consistent with the immunostaining in demonstrating that the hPIPCs differentiation was successful and that the progenitors from both species are comparable.

The "Human UP" genes include *FOXP2*, *MTRNR2L8*, *DHX40*, *VPS13B*, *WDFY2*, and *PURB*, all of which are associated with neurodevelopment or neurodegenerative disease (Abrajano et al., 2009; Hickey et al., 2019; Kamboh et al., 2019; Kolehmainen et al., 2003; MacDermot et al., 2005; Mathys et al., 2019; Sin et al., 2015; Taher et al., 2014). The "Chimp UP" genes include *HIST1H3A*, *BLC2L2*, and *CLIC1* which have been reported as expressed in the hippocampus and associated with sleep, AD, and neurite outgrowth (Averaimo et al., 2014; Datson et al., 2009; Wei, 2020).

To understand the transcriptional programs driving these differences in gene expression, we conducted an Ingenuity Pathway Analysis. Three of the top five upstream regulators predicted by the pathway analysis were the transcription factors CREB1, FOXA2 and TBR2 (EOMES) (Fig. 2C). CREB1 is known to regulate genes involved in the nervous system and neurodevelopment (reviewed in Sakamoto et al., 2011), FOXA2 controls dopaminergic neuronal development and disease (Kittappa et al., 2007), and TBR2 plays a crucial role in cortical and hippocampal neurogenesis and is the signature marker of the intermediate progenitor population (Cipriani et al., 2016; Englund, 2005). This pathway analysis was consistent with the RNA-seq data as predicted targets of all three transcription factors were also found to

be among the 2,588 genes differentially expressed between human and chimpanzee hpIPCs (Fig. 2D, Supplementary Table 1.2-1.4). The pathway analysis also determined that several of the differentially expressed genes are involved in embryonic development (Fig. 2D, Supplementary Table 1.5). Overall, these findings indicate that previously characterized neurodevelopmental gene regulatory networks are utilized differently during human and chimpanzee hippocampal development.

### Human-specific chromatin accessibility patterns in hippocampal intermediate progenitors

After identifying differentially expressed genes and the transcriptional networks that may be involved, we sought to identify cis-regulatory differences between the human and chimpanzee hpIPCs. To this end, we conducted ATAC-seq on the hpIPCs from both species. We used the same batches of differentiated iPSCs for the ATAC-seq as we did for the RNA-seq (i.e. from the same batch of differentiation), and generated 100 bp long Paired-End Illumina reads.

We first performed a “human-centric” analysis. We aligned the ATAC-seq reads from all six cell lines to the respective reference genome assemblies (hg19 for the human cell lines, panTro5 for the chimpanzee cell lines) and only retained uniquely mapped reads with high mapping quality (Samtools Q = 10 filtering). Next, we identified regions of accessible chromatin (peaks; FDR < 0.05) in all three human cell lines. Only peaks replicated in all the three human lines were retained. To carry out a proper comparison, we only retained replicated human ATAC-seq peaks with orthologs in the chimpanzee genome (see methods; Fig. 3A). This filtering ultimately resulted in 82,235 human ATAC-seq peaks replicated in all the human cell lines and with orthologs in the chimpanzee genome. These 82,235 regions were used for downstream analysis. We found that the chromatin accessibility at these regions was highly reproducible across all three human cell lines (Fig. 3B).

Next, we quantified the ATAC-seq read depth for each of the 82,235 regions and used DESeq2 to identify sites exhibiting differential chromatin accessibility between the two species. In total, we identified 3,006 differentially accessible regions (FDR < 0.05; log2foldChange > 1.5 or < -1.5; Supplementary Table 2.1-2.2). Of these regions, 92.3% were located at least 1 kb away from the closest transcription start site (TSS), suggesting they could be putative enhancers, while the remaining were putative promoters (Fig. 3C). As expected, given that this analysis was performed with a human-centric approach, 90.1% of the differentially accessible (DA) peaks were significantly more accessible in the human hpIPCs relative to chimpanzee hpIPCs (“Human UP”; Fig. 3C).

As TE insertions can be a source of cis-regulatory evolution, we examined whether the DA regions were more likely to overlap with a TE than those which were accessible to the same degree in both species (non-DA, Fig. 3D and Supplementary Table 2.4-2.5). We observed that 1,335/3,006 (44.4%) DA regions overlapped a TE (Supplementary Table 2.3). This is significantly higher than what was observed for the non-DA peaks (33.2% overlapped a TE; Two-sided Fisher’s Exact Test,  $p < 0.0001$ ; Fig. 3D). This indicates that chromatin regions with human-specific accessibility are significantly more likely to be TE-derived than the regions with accessibility levels conserved between human and chimpanzee.

Next, we associated the nearest gene to each DA region and found that TE-derived DA regions were significantly more likely to be near a differentially expressed gene relative to non-TE derived DA regions (Two-sided Fisher’s Exact Test,  $p = 0.016$ ; Fig. 3E). Finally, we investigated whether specific TE families were overrepresented among the TE-derived DA regions and found enrichment for LTRs. While LTRs account for ~16% of all human annotated TEs, they represented 33.9% of the TEs overlapping DA regions in our human-centric analysis (Two-Sided Fisher’s Exact Test  $p < 0.0001$ ; Fig. 3F and Supplementary Table 2.6). Of these enriched LTRs, 97.1% were ERVs. Notably, 31.7% of those LTR-derived DA regions were located near a differentially expressed gene (Two-Sided Fisher’s Exact Test  $p < 0.0001$ ).

Together, these data indicate that there are TE-derived cis-regulatory elements that have significantly greater accessibility in humans than chimpanzees during hippocampal neurogenesis. These TE insertions preceded the human-chimpanzee split, but the difference in accessibility is species-specific,



suggesting that the co-option into gene regulatory networks took place after the human-chimpanzee divergence.

### **Chimpanzee-specific chromatin accessibility patterns in hippocampal intermediate progenitors**

We repeated the ATAC-seq analysis as described above, but this time with a “chimpanzee-centric” approach. We started from a set of 72,211 peaks found as replicated in all the three chimpanzee lines and with orthologs in both species (Figs. 4A,B). With this approach, we identified 3,806 ATAC-seq peaks as differentially accessible (DA) between human and chimpanzee (FDR < 0.05; log2foldChange > 1.5 or < -1.5; Supplementary Table 3.1-3.2), 82% of which displayed greater accessibility in chimpanzee as compared to humans (i.e. “Chimp UP”; Fig. 4C). Similar to what we observed with the human-centric analysis, 97.9% of the 3,806 DA regions were putative enhancers (distance > 1Kb from TSS; Fig. 4C).

As seen in the human-centric analysis, chimpanzee-specific DA peaks were more likely to be TE-derived than those similarly accessible across species (Two-sided Fisher’s Exact Test,  $p < 0.0001$ ; Fig. 4D and Supplementary Tables 3.3-3.5). Of the chimpanzee DA regions, 37.1% overlapped an annotated chimpanzee TE, compared to only 28.1% of the non-DA regions (Two-sided Fisher’s Exact Test,  $p < 0.0001$ ; Fig. 4D). However, the TE-derived enhancers in this chimpanzee-centric analysis were no more likely than the non-TE derived ones to be located near differentially expressed genes (Fig. 4E).

We found enrichment for LTRs, which account for approximately 16% of the chimpanzee TEs but represented 36.1% of the TE-derived DA regions (Two-sided Fisher’s Exact Test,  $p$ -value < 0.0001; Fig. 4F and Supplementary Table 3.6; 98.2% were ERVs), and SVAs, which account for just 0.25% of annotated chimpanzee TEs but represented 1.1% of the TE-derived DA regions (Two-sided Fisher’s Exact Test,  $p < 0.0001$ , Fig 4G and Supplementary Table 3.8). In particular, the SVA-B and C subfamilies were the most enriched (Fig. 4H). Together, these data indicate that chimpanzee ERV and SVA transposons were co-opted into regulatory elements important for the developing chimpanzee hippocampal intermediate progenitors.

### **Genomic features underlying species-specific LTR enrichment at hpIPC enhancers**

We aimed to further investigate genomic features potentially underlying the LTR enrichment among the differentially accessible hippocampal progenitor regions. To this end, we conducted a motif analysis using the MEME suite (Bailey et al., 2015). Binding motifs for CTCF and EGR2 were detected as enriched in the LTR-derived differentially accessible regions identified from both the human-centric and chimpanzee-centric analyses (Figs. 5A, 5C). EGR2 is an early response gene involved in learning and memory, in the brain’s response to stimuli, and in hippocampal synaptic plasticity (Cheval et al., 2012; Mukherjee et al., 2021; Poirier et al., 2007). CTCF, a well-known regulator of chromatin structure, has been implicated in various neurodevelopmental disorders (reviewed in Davis et al., 2018)

We identified 63 differentially expressed genes located near the human-enriched LTRs (Fig. 5B and Supplementary Table 2.7). These included *GLUL*, a glutamine synthetase hypothesized to provide neuroprotection in AD patients, (Kohane and Wood, 2021) and *DLK1*, a Notch ligand involved in SVZ neurogenesis (Ferrón et al., 2011), both of which are upregulated in human hpIPCs compared to chimpanzee hpIPCs.

We identified 34 differentially expressed genes located near the chimp-enriched LTRs (Fig. 5D and Supplementary Table 3.7). For the chimp-centric analysis the differentially expressed genes located near TE-derived enhancers with species-specific accessibility included *HIST1H3A* and *MTRNR2L8* (Fig. 5D). These genes were highly upregulated in the chimpanzee and human hpIPCs, respectively (Fig. 5D). Importantly, *HIST1H3A* has been associated with autism spectrum disorders and sleep deprivation (Crawley et al., 2016; Wei, 2020) while *MTRNR2L8* has been reported as upregulated in Alzheimer’s patients (Mathys et al., 2019). *BDNF*, which is involved in hippocampal neurogenesis and plays an important role

in the SVZ (Bath et al., 2012), was highly upregulated in the chimpanzee and also located near an LTR-derived enhancer with chimpanzee-specific accessibility.

### Human-Specific SVAs play a major role in hippocampal neurogenesis

As mentioned earlier, the chimpanzee-centric analysis also identified SVA transposons as enriched within chimpanzee-specific enhancers (Fig. 6A and Supplementary Table 3.8). These SVAs were enriched for the identified binding motifs of the neurodevelopmental factors ASCL1, ZIC1, and KLF8 (Andersen et al., 2014; Aruga, 2004; Yi et al., 2014) as well as the JUN/FOS AP-1 dimer, which is a known enhancer activator (Raivich, 2008; Raivich and Behrens, 2006) (Fig 6A).

It is important to remark that all the analyses shown so far were exclusively based on genomic sites with characterized orthologs in both species, to ensure an “apple-to-apple” comparison. However, nearly 2,000 SVA copies, including the entire SVA-E and F subfamilies, are exclusive to the human genome. Given that previous studies found that SVAs are highly enriched in active enhancers and promoters of the human hippocampus (Trizzino et al., 2018), we sought to investigate this further. We focused on the SVA copies exclusively present in the human genome and not in any other primate genome (hereafter human-specific SVAs). We performed sequence-based motif analysis for all the human-specific SVAs and identified the binding motif for the hPIPCs signature factor TBR2 (EOMES) as the most enriched ( $p = 10^{-2103}$ ; Fig. 6B). Motifs for other transcription factors associated to hippocampal neurogenesis and function were also recovered (SMAD4, VDR, PLAG1; Fig. 6B).

Next, we annotated all of the genes found within 50 kb from each human-specific SVA. A total of 2,216 genes were recovered using this approach. We performed Pathway Analysis on this set of genes and found that Melatonin Degradation and Nicotine Degradation were the two most significantly enriched pathways ( $p = 7.6 \times 10^{-6}$  and  $p = 2.5 \times 10^{-5}$  respectively; Fig. 6C) and PHF8 was recovered as the top upstream regulator for the gene network (Fig. 6C). Notably, both Melatonin and Nicotine Degradation pathways are strongly active in the human hippocampus. PHF8 is a histone demethylase that contributes to the regulation of mTOR. The mTOR pathway is hyperactive in the human hippocampus where it regulates the protein synthesis-dependent plastic changes underlying learning and memory (Bekinschtein et al., 2007; Fortress et al., 2013; Graber et al., 2013). Mutations in the *PHF8* gene cause cognitive impairment and intellectual disability (Chen et al., 2018).

Therefore, we sought to determine the contribution of human-specific SVAs to the TBR2-mediated gene regulatory network in human hPIPCs. Using our ATAC-seq data, we identified 1,816 human SVAs as accessible in human hPIPCs (Fig. 6D). Of these, nearly a quarter (434) displayed high accessibility, while 1,382 were moderately accessible (Fig. 6D). Next, we used chromatin immunoprecipitation followed by sequencing (ChIP-seq) to profile TBR2 binding in two human lines at day 5 of hPIPC differentiation. As with the previous sequencing experiments, we generated 100 bp long Paired-End reads and only retained uniquely mapping high quality reads (Samtools  $q=10$  filtering) in order to maximize our chance to properly map reads on repetitive regions. This experiment revealed that 739 of the accessible SVAs showed TBR2 signal in the two human lines (Fig. 6D and Supplementary Table 2.8). Notably, 257 of the (48.3%) TBR2-bound SVAs were human-specific. (Fig. 6E and Supplementary Table 2.9). TBR2-bound human-specific SVAs were located near 37 genes that our RNA-seq analysis identified as differentially expressed between human and chimpanzee (Fig. 6F and Supplementary Table 2.10). These genes include *VPS13B* (up in humans), which is responsible for a rare developmental disease known as Cohen Syndrome (Kolehmainen et al., 2003), *NR4A2* (down in humans), which has been implicated in neurodevelopmental language impairment (Reuter et al., 2017), *DHX40* (down in humans), which is implicated in Alzheimer’s (Taher et al., 2014), and *E2F1* (up in humans), which is a cell cycle regulator associated with several neurodegenerative diseases such as Alzheimer’s (Zhang et al., 2010).

In summary, these data support a model in which human-specific SVAs provided a substrate for binding sites of TBR2 and other important hippocampal regulators. Therefore, it is likely they were co-

opted in the gene regulatory networks active during hippocampal neurogenesis, which led to human-specific regulation of key genes.

### **CRISPR-mediated SVA repression has massive repercussions on global gene expression**

To further assess the contribution of SVA transposons to the gene regulation of hippocampal intermediate progenitors, we leveraged CRISPR-interference to simultaneously repress most of the active SVAs. We utilized NCCIT cells treated with retinoic acid (RA) as the experimental system for this purpose. The NCCIT cell line is derived from embryonal carcinoma and thus exhibits a gene expression signature highly similar to human embryonic stem cells (Fuentes et al., 2018). Importantly, NCCITs treated for 7 days with RA differentiate into intermediate neural progenitor-like cells expressing both PAX6 and TBR2 (Mandal et al., 2015; Fig 7A). We cloned a stable NCCIT line with a permanently incorporated doxycycline-inducible, catalytically-dead Cas9 fused to a repressive KRAB domain (dCas9-KRAB). The KRAB domain deposits repressive histone methylation (H3K9me3) to the regions targeted by the dCas9 via single guide-RNAs (sgRNAs). Into this same line, we also permanently knocked-in two single guide-RNAs (sgRNAs) that are able to target >80% of all SVAs (Pontis et al. 2019). Hereafter, we refer to the RA-treated CRISPR line as RA-NCCITs.

Remarkably, exposing the RA-NCCITs to doxycycline for 72 hours was sufficient to induce dCas9 activation (Fig. 7B) and the deposition of repressive histone methylation (H3K9me3) on over 2,500 previously unmethylated SVAs (Fig. 7C). We next performed RNA-seq on the RA-NCCITs with or without doxycycline treatment (three replicates per condition). First, we observed that the genome-wide expression levels (TPMs) of the RA-NCCITs were highly correlated with those of the iPSC-derived human hPIPCs (Pearson correlation = 0.93;  $p < 2.2 \times 10^{-16}$ ). This indicates that RA-treated NCCITs are appropriate to model hippocampal intermediate progenitors.

Then, we compared the expression levels of the RA-NCCITs with or without doxycycline treatment and identified 5,795 differentially expressed genes (FDR < 0.05; Fig. 7D and Supplementary Table 4.1). Of these genes, 677 were previously identified as differentially expressed when comparing human to chimpanzee hPIPCs (Fig. 7E; Supplementary Table 4.2). Remarkably, 69.5% of these 677 genes were downregulated in RA-NCCITs upon SVA repression. In other words, the expression of over a quarter (26.1%) of the genes that exhibited human-specific expression signature in hippocampal intermediate progenitors seem to be under control of SVA transposons. Importantly, one of these genes was *FOXP2*, which has been associated with the evolution of language and is implicated in several speech-disorders (Enard, 2011; Liégeois et al., 2016; MacDermot et al., 2005).

Finally, we examined the genes identified as being near a TBR2-bound human-specific SVA in iPSC-derived hPIPCs, and found that nearly a third of them lose expression in RA-NCCITs upon SVA repression (Fig. 7F). In summary, our functional experiments indicate a widespread role for human-specific SVA transposons as cis-regulatory elements during hippocampal neurogenesis.

### **Discussion**

The hippocampus is susceptible to specific neurodegenerative disorders such as Alzheimer's Disease but may have also played an important role in the evolution of human cognition. Spatial memory, which is attributed to the hippocampus, may have contributed to the geographic expansion of ancient humans. Characterizing the human-specific gene regulatory networks of hippocampal development provides insight into its role in human evolution. Though there is no consensus on whether the cognitive phenotypes seen in AD are uniquely human, understanding the unique properties of the human hippocampus may lead the way to potential treatments. Thus, the work described here is relevant both in terms of evolutionary developmental biology and evolutionary medicine.

To study the evolution of the human hippocampus from a developmental standpoint, we investigated the extent to which TEs contributed to gene expression profiles of human and chimpanzee



hippocampal intermediate progenitors. TEs account for nearly ~50% of the human genome composition and many elegant studies have established that at least a fraction of the TEs can regulate the host genes in humans and other primates (Chuong et al., 2013; Chuong et al., 2016; Cosby et al., 2021; del Rosario et al., 2014; Du et al., 2016; Fuentes et al., 2018; Jacques et al., 2013; Judd et al., 2021; Lynch et al., 2011; Lynch et al., 2015; Mika et al., 2021; Modzelewski et al., 2021; Okhovat et al., 2020; Rayan et al., 2016; Schmidt et al., 2012; Sundaram et al., 2014; Trizzino et al., 2017; Trizzino et al., 2018; Ward et al., 2018; Xie et al., 2013).

The hplPCs are a transient progenitor population during a critical developmental stage in the Sub-ventricular zone (SVZ) of both the hippocampus and neocortex (Bulfone et al., 1999; Cipriani et al., 2016; Englund, 2005; Kimura et al., 1999), and there is consensus that this progenitor population may have played a role in the evolution of brain volume in mammals (Florio and Huttner, 2014; Martínez-Cerdeño et al., 2006). To study the developmental evolution of human hplPCs, we leveraged a comparative approach centered on differentiating human and chimpanzee iPSCs into a neuronal population which closely recapitulates hplPCs, as demonstrated by the high expression of signature markers such as TBR2 and PAX6.

The transcriptomes of human and chimpanzee hplPCs have not been previously compared, largely due to the limited availability of primary tissue. Here, we carried out this comparison using our iPSC-derived system and identified profound differences between the two species, with over 2,500 genes differentially expressed at this stage. These genes include several which were previously associated with cognitive function, language, neurodevelopment and neurodegeneration, many of which are upregulated in humans relative to the chimpanzee (e.g. *MTRNR2L8*, *DHX40*, *VPS13B*, *WDFY2*, *PURB*).

We demonstrate that species-specific enhancers significantly contributed to the gene expression differences we identified. This is consistent with recent studies that used primary brain tissues from several species to profile species-specific cis-regulatory activity in mammals (Emera et al., 2016; Reilly et al., 2015). Importantly, we find that these species-specific enhancers are enriched for young transposable elements. Several studies have identified evolutionarily young L1 LINEs as active in the brain during different developmental stages, suggesting that they could serve as alternative promoters for many genes involved in neuronal functions (Coufal et al., 2009; Jönsson et al., 2019; Sur et al., 2017; Thomas et al., 2012; Zhao et al., 2019). Here, we identified other young transposable elements, ERVs and SVAs, as regulators of intermediate progenitor gene expression. The identification of ERVs as candidate enhancers in human and chimpanzee intermediate progenitors is consistent with previous studies that demonstrated that ERVs heavily impact the gene regulatory programs during immune response (Chuong et al., 2013; Chuong et al., 2016), in pluripotency maintenance and development (Coluccio et al., 2018; Fuentes et al., 2018; Miao et al., 2020), in the mammalian placenta (Lynch et al., 2011; Lynch et al., 2015; Mika et al., 2021), in the primate liver (Trizzino et al., 2017), and in many cancer types (Ito et al.; Ivancevic and Chuong, 2020; Shah et al., 2021). Similar to the L1s, the ERVs also possess a well-defined cis-regulatory architecture (e.g. they have their own promoter), and this may have had a role in the co-option of these TEs as functioning cis-regulatory elements.

The SVAs are particularly interesting from a human evolution standpoint, given that half of the known copies are exclusively present in our species. Moreover, SVAs are among the few transposable elements that still exhibit active transposition in the human genome. We and others have previously revealed that SVAs can be source of enhancers in primates (Playfoot et al., 2021; Pontis et al., 2019; Trizzino et al., 2017; Trizzino et al., 2018). The repression of some SVAs by specific zinc-finger proteins at specific stages of neuronal development is also a crucial mechanism for successful neurogenesis (Playfoot et al., 2021; Pontis et al., 2019; Turelli et al., 2020). Here, we demonstrate that SVAs are pervasive regulators of hippocampal neurogenesis and they act as enhancers in the hippocampal intermediate progenitor population. By using CRISPR-interference (CRISPR-i), we show that repressing hundreds of normally “de-repressed” SVAs alters the expression of thousands of genes. Intriguingly, our CRISPR-i

experiments revealed that global SVA repression leads to the attenuation of the expression levels of over a quarter of the ~2,500 genes previously identified as with human-specific gene expression signal in hippocampal intermediate progenitors. These include critical neurodevelopmental regulators such as *FOXP2*, *HAND2*, *MEF2C*, *SOX2*, and *SOX4*. In normal conditions, these genes are more highly expressed in humans relative to the chimpanzee, but upon SVA repression these differences were diminished.

In conclusion, our findings indicate that the development of hippocampal neurons has been profoundly affected by the domestication of young transposable elements. These young TEs have been co-opted as functional enhancers and promoters and ultimately rewired the expression of hundreds of critically important neuro-regulators in the developing human hippocampus. The human-specific gene expression and the associated TE-derived enhancers we have identified here may play important roles both in human evolution and neurodegenerative disease.

## Materials and Methods

### Antibodies

| Antibody | Catalog number         | Use                | Dilution       |
|----------|------------------------|--------------------|----------------|
| TBR2     | Abcam ab23345          | Immunofluorescence | 1:250          |
| TBR2     | Abcam ab216870         | ChIP               | 15 ug per ChIP |
| TBR2     | Santa Cruz sc - 293481 | Western Blot       | 1:500          |
| PAX6     | DHSB AB_528427         | Immunofluorescence | 1:20           |
| OTX2     | R&D Systems AF1979     | Immunofluorescence | 1:500          |
| H3K9me3  | Abcam ab8898           | ChIP               | 3 ug per ChIP  |
| GAPDH    | CST #5174              | Western Blot       | 1:1000         |

### Human and Chimpanzee iPSC cultures

The human male iPSC line denoted as SV20 was obtained from the University of Pennsylvania, where it was generated, and validated by the expression of pluripotency markers and differentiation into various cell types in multiple studies (Pagliaroli et al., 2021; Pashos et al., 2017; Yang et al., 2015; Zhang et al., 2015). The human female iPSC line GM 23716 was obtained from the Coriell Institute for Medical Research (Camden, NJ) and validated by the expression of pluripotency markers and differentiation into cranial neural crest cells in a previous study (Pagliaroli et al., 2021). The human female iPSC line 21792 and all three of the chimpanzee iPSC lines were obtained from the laboratory of Yoav Gilad at the University of Chicago and validated in previous studies (Gallego Romero et al., 2015; Ward et al., 2018).

The iPSC lines were expanded in feeder-free, serum-free mTeSR™1 medium (STEMCELL Technologies). Cells were passaged ~1:10 at 80% confluency using ReLeSR (STEMCELL Technologies) and small cell clusters (50–200 cells) were subsequently plated on tissue culture dishes coated overnight with Geltrex™ LDEV-Free hESC-qualified Reduced Growth Factor Basement Membrane Matrix (Fisher-Scientific).

### hpIPC Differentiation

The iPSC lines were differentiated into hpIPCs as previously described (Yu et al. 2014). 3 batches comprised of one human and one chimpanzee iPSC line each were cultured until approximately 50-70% confluence was reached and then treated with the hpIPC media for five days prior to collection for RNA-seq, ATAC-seq, ChIP-seq or immunofluorescence. The hpIPC media consists of DMEM/F12, 0.5X N2, 0.5X B27, DKK-1, cyclopamine, Noggin, and SB431542 as well as the antibiotic Penn-Strep.

## Western Blot

For total lysate, cells were harvested and washed three times in 1X PBS and lysed in RIPA buffer (50mM Tris-HCl pH7.5, 150mM NaCl, 1% Igepal, 0.5% sodium deoxycholate, 0.1% SDS, 500uM DTT) with proteases inhibitors. Twenty  $\mu$ g of whole cell lysate were loaded in Novex WedgeWell 4-20% Tris-Glycine Gel (Invitrogen) and separated through gel electrophoresis (SDS-PAGE) Tris-Glycine-SDS buffer (Invitrogen). The proteins were then transferred to ImmunBlot PVDF membranes (ThermoFisher) for antibody probing. Membranes were incubated with 10% BSA in TBST for 30 minutes at room temperature (RT), then incubated for variable times with the suitable antibodies diluted in 5% BSA in 1X TBST, washed with TBST and incubated with a dilution of 1:10000 of secondary antibody for one hour at RT. The antibody was then visualized using Super Signal West Dura Extended Duration Substrat (ThermoFisher) and imaged with Amersham Imager 680. Used antibodies are listed in the “Antibodies” section of the methods.

## Immunofluorescence

Upon fixation (4% PFA for 10 minutes), cells were first treated with 10 mM sodium citrate (pH = 6) for 10 minutes at 95 C. The cells were then permeabilized in blocking solution (0.1% Triton X-100, re PBS, 5% normal donkey serum) for one hour at room temperature and then incubated overnight at 4 C with the primary antibody of interest. Subsequently, the cells were treated with blocking solution for 30 minutes at room temperature and then fluorophore-conjugated secondary antibodies for 2 hours at room temperature. The cell nuclei were stained with 4,6-diamidine-2-phenylindole dihydrochloride (DAPI; Sigma-Aldrich; 50 mg/ml in PBS for 15 min at RT). Immunostained cells analyzed with confocal microscopy, using a Nikon A1R+. Images were captured with a 40X objectives and a pinhole of 1.2 Airy unit. Analyses were performed in sequential scanning mode to rule out cross-bleeding between channels. Used antibodies are listed in the “Antibodies” section of the methods.

## Real-time quantitative polymerase chain reaction (RT-qPCR)

Cells were lysed in Tri-reagent and RNA was extracted using the Direct-zol RNA MiniPrep kit (Zymo research). 600ng of template RNA was retrotranscribed into cDNA using RevertAid first strand cDNA synthesis kit (Thermo Scientific) according to manufacturer directions. 15ng of cDNA were used for each real-time quantitative PCR reaction with 0.1  $\mu$ M of each primer, 10  $\mu$ L of PowerUp™ SYBR™ Green Master Mix (Applied Biosystems) in a final volume of 20  $\mu$ L, using QuantStudio 3 Real-Time PCR System (Applied Biosystem). Thermal cycling parameters were set as following: 3 minutes at 95°C, followed by 40 cycles of 10 s at 95°C, 20 s at 63°C followed by 30 s at 72°C. Each sample was run in triplicate. 18S rRNA was used as normalizer. Primer sequences are reported in Supplementary Data 1.

## ChIP-Seq and ChIP-qPCR

Samples from different conditions were processed together to prevent batch effects. 15 million cells were cross-linked with 1% formaldehyde for 5 min at room temperature, quenched with 125mM glycine, harvested and washed twice with 1× PBS. The pellet was resuspended in ChIP lysis buffer (150 mM NaCl, 1% Triton X-100, 0.7% SDS, 500  $\mu$ M DTT, 10 mM Tris-HCl, 5 mM EDTA) and chromatin was sheared to an average length of 200–500 bp, using a Covaris S220 Ultrasonicator. The chromatin lysate was diluted with SDS-free ChIP lysis buffer. For ChIP-seq, 10  $\mu$ g of antibody (3  $\mu$ g for H3K27ac) was added to 5  $\mu$ g of sonicated chromatin along with Dynabeads Protein A magnetic beads (Invitrogen) and incubated at 4 °C overnight. On day 2, beads were washed twice with each of the following buffers: Mixed Micelle Buffer (150 mM NaCl, 1% Triton X-100, 0.2% SDS, 20 mM Tris-HCl, 5 mM EDTA, 65% sucrose), Buffer 500 (500 mM NaCl, 1% Triton X-100, 0.1% Na deoxycholate, 25 mM HEPES, 10 mM Tris-HCl, 1 mM EDTA), LiCl/detergent wash (250 mM LiCl, 0.5% Na deoxycholate, 0.5% NP-40, 10 mM Tris-HCl, 1 mM EDTA) and a final wash was performed with 1× TE. Finally, beads were resuspended in 1× TE containing 1% SDS and incubated at 65 °C for 10 min to elute immunocomplexes. Elution was repeated twice, and the samples

were further incubated overnight at 65 °C to reverse cross-linking, along with the untreated input (5% of the starting material). On day 3, after treatment with 0.5 mg/ml Proteinase K for 1h at 65 °C, DNA was purified with Zymo ChIP DNA Clear Concentrator kit and quantified with QUBIT.

For all ChIP-seq experiments, barcoded libraries were made with NEB ULTRA II DNA Library Prep Kit for Illumina, and sequenced on Illumina NextSeq 500, producing 100 bp PE reads.

For ChIP-qPCR, on day 1 the sonicated lysate was aliquot into single immunoprecipitations of  $2.5 \times 10^6$  cells each. A specific antibody or a total rabbit IgG control was added to the lysate along with Protein A magnetic beads (Invitrogen) and incubated at 4 °C overnight. On day3, ChIP eluates and input were assayed by real-time quantitative PCR in a 20 µl reaction with the following: 0.4 µM of each primer, 10 µl of PowerUp SYBR Green (Applied Biosystems), and 5 µl of template DNA (corresponding to 1/40 of the elution material) using the fast program on QuantStudio qPCR machine (Applied Biosystems). Thermal cycling parameters were: 20sec at 95 °C, followed by 40 cycles of 1sec at 95°C, 20sec at 60°C. Used antibodies are listed in the “Antibodies” section of the methods.

### ChIP-seq Analyses

After removing the adapters with TrimGalore!, the sequences were aligned to the reference hg19, using Burrows Wheeler Alignment tool (BWA), with the MEM algorithm<sup>64</sup>. Uniquely mapping aligned reads were filtered based on mapping quality (MAPQ > 10) to restrict our analysis to higher quality and likely uniquely mapped reads, and PCR duplicates were removed. We called peaks for each individual using MACS2<sup>65</sup> (H3K27ac) or Homer<sup>66</sup>, at 5% FDR, with default parameters.

### RNA-Seq

Cells were lysed in Tri-reagent (Zymo research) and total RNA was extracted using Quick-RNA Miniprep kit (Zymo research) according to the manufacturer’s instructions. RNA was further quantified using DeNovix DS-11 Spectrophotometer while the RNA integrity was checked on Bioanalyzer 2100 (Agilent). Only samples with RIN value above 8.0 were used for transcriptome analysis. RNA libraries were prepared using 1 µg of total RNA input using NEBNext® Poly(A) mRNA Magnetic Isolation Module, NEBNext® UltraTM II Directional RNA Library Prep Kit for Illumina® and NEBNext® UltraTM II DNA Library Prep Kit for Illumina® according to the manufacturer’s instructions (New England Biolabs).

### RNA-Seq Analyses

After removing the adapters with TrimGalore!, Kallisto (Bray et al., 2016) was used to count reads mapping to each gene. We analyzed differential gene expression levels with DESeq2 (Love et al., 2014), with the following model: design = ~condition, where condition indicates either Human or Chimpanzee.

### ATAC-Seq

For ATAC-Seq experiments, 50,000 cells per condition were processed as described in the original ATAC-seq protocol paper (Buenrostro et al. 2013). ATAC-seq data were processed with the same pipeline described for ChIP-seq, with one modification: all mapped reads were offset by +4 bp for the forward-strand and -5 bp for the reverse-strand. Peaks were called using MACS2 (Zhang et al., 2008).

### Generation of the NCCIT-dCas9KRAB-SVAsgRNA Stable Cell Line

A dCas9-KRAB was cloned into a piggyBac transposon containing ampicillin and puromycin resistance (Addgene) which was obtained from the Wysocka Lab at Stanford University. The piggyBac dCas9-KRAB doxycycline-inducible plasmid, along with a piggyBac transposase (Cell Signaling), were transfected into NCCIT cells (ATCC) at ~70% confluency using a 6:1 ratio of Eugene HD (Promega) for 48 hours in ATCC-formulated RPMI media. Two days post-transfection, the media was changed and the transfected cells were selected for using 1µg puromycin per 1mL media. A piggyBac transposon plasmid containing two

sgRNAs (SVAsgRNA1: 5'CTCCCTAATCTCAAGTACCC 3' and SVAsgRNA2: 5' TGTTTCAGAGAGCACGGGGT 3'; Integrated DNA Technologies) targeting ~80% of all annotated SVAs in humans (Pontis et al. 2019), along with a piggyBac transposase, were transfected into the NCCIT-dCas9KRAB cells using a 6:1 ratio of Eugene HD for 48 hours in ATCC-formulated RPMI media. Two days post-transfection, the media was changed and the transfected cells were selected for using 400µg geneticin per 1mL of media in addition to 1µg puromycin per 1mL media. The NCCIT-dCas9KRAB-SVAsgRNA cell line was maintained in ATCC-formulated RPMI media supplemented with 10% tet-free FBS, 1% L-glutamine, 1µg/mL puromycin, and 400µg/mL geneticin and incubated at 5% CO<sub>2</sub>, 20% O<sub>2</sub> at 37°C.

### **Retinoic Acid-induced neuronal differentiation and CRISPR-interference of NCCIT-dCas9KRAB-SVAsgRNA cells**

The NCCIT-dCas9KRAB-SVAsgRNA cells, at ~20% confluency, were treated with 10µM retinoic acid (RA) per 10mL media for 1 week to induce neuronal differentiation. At day 4, the media was refreshed and the cells were additionally treated with 2µg doxycycline per 1mL of media for 3 days. The cells were collected on day 7 of RA treatment (day 3 of doxycycline treatment) for qPCR and genomic experiments. Expression of the doxycycline-inducible dCas9 was verified via western blot.

### **Statistical and genomic analyses**

All statistical analyses were performed using R v3.3.1 or Graphpad Prism version 9.2.0 for Mac OS X. BEDtools v2.27.1 (Quinlan and Hall, 2010) was used for genomic analyses. Pathway analysis was performed with Ingenuity Pathway Analysis Suite (QIAGEN Inc., <https://www.qiagenbioinformatics.com/products/ingenuity-pathway-analysis>). Motif analyses were performed using the MEME-Suite (Bailey et al., 2015), and specifically with the Meme-ChIP application. Fasta files of the regions of interest were produced using BEDTools v2.27.1. Shuffled input sequences were used as background. E-values < 0.001 were used as threshold for significance. Orthologous ATAC-seq regions were identified using the University of California Santa Cruz Genome Browser tool LiftOver.

### **Acknowledgements**

The authors are grateful for Dr. Yoav Gilad (University of Chicago) for providing all the chimpanzee lines and one of the human lines, and to Dr. Joanna Wysocka's lab, and in particular Dr. Raquel Fueyo (Stanford University), for providing CRISPR reagents and critical advice. The authors thank the Thomas Jefferson Stem Cell and Regenerative Neuroscience Center for the support in the process of optimization of the iPSC differentiation. The authors are grateful to Trizzino lab members Luca Pagliaroli, PhD and Chiara Scopa, PhD for help with specific analyses and experiments. The authors thank the Genomic Facility at The Wistar Institute (Philadelphia, PA) for the Next Generation Illumina Sequencing. The PAX6 antibody developed by Kawakami, A. was obtained from the Developmental Hybridoma Bank, created by the NICHD of the NIH and maintained at The University of Iowa, Department of Biology, Iowa City, IA 52242.

### **Competing interests**

The authors declare no competing interests.

### **Funding**

For this work, M.T. was funded by the National Institute of Health (NIH-NIGMS R35GM138344) and by the G. Harold and Leila Y. Mathers Foundation.

### **Data availability**

The original genome-wide data generated in this study have been deposited in the GEO database under accession code GSE189347.



## Author contributions

MT and SP designed the project. SP performed most of the experiments. SB carried out the CRISPR experiments in NCCIT cells. MT and SP analyzed the data and wrote the manuscript. All the authors read and approved the manuscript.

## References

- Abrajano, J. J., Qureshi, I. A., Gokhan, S., Zheng, D., Bergman, A. and Mehler, M. F. (2009). REST and CoREST Modulate Neuronal Subtype Specification, Maturation and Maintenance. *PLOS ONE* 4, e7936.
- Agoglia, R. M., Sun, D., Birey, F., Yoon, S.-J., Miura, Y., Sabatini, K., Paşca, S. P. and Fraser, H. B. (2021). Primate cell fusion disentangles gene regulatory divergence in neurodevelopment. *Nature* 592, 421–427.
- Andersen, J., Urbán, N., Achimastou, A., Ito, A., Simic, M., Ullom, K., Martynoga, B., Lebel, M., Göritz, C., Frisén, J., et al. (2014). A Transcriptional Mechanism Integrating Inputs from Extracellular Signals to Activate Hippocampal Stem Cells. *Neuron* 83, 1085–1097.
- Arnold, S. J., Huang, G.-J., Cheung, A. F. P., Era, T., Nishikawa, S.-I., Bikoff, E. K., Molnar, Z., Robertson, E. J. and Groszer, M. (2008). The T-box transcription factor Eomes/Tbr2 regulates neurogenesis in the cortical subventricular zone. *Genes & Development* 22, 2479–2484.
- Aruga, J. (2004). The role of Zic genes in neural development. *Mol Cell Neurosci* 26, 205–221.
- Averaimo, S., Gritti, M., Barini, E., Gasparini, L. and Mazzanti, M. (2014). CLIC1 functional expression is required for cAMP-induced neurite elongation in post-natal mouse retinal ganglion cells. *Journal of Neurochemistry* 131, 444–456.
- Bailey, T. L., Johnson, J., Grant, C. E. and Noble, W. S. (2015). The MEME Suite. *Nucleic Acids Research* 43, W39–W49.
- Barger, N., Hanson, K. L., Teffer, K., Schenker-Ahmed, N. M. and Semendeferi, K. (2014). Evidence for evolutionary specialization in human limbic structures. *Front. Hum. Neurosci.* 8,.
- Bath, K. G., Akins, M. R. and Lee, F. S. (2012). BDNF control of adult SVZ neurogenesis. *Developmental Psychobiology* 54, 578–589.
- Bekinschtein, P., Katche, C., Slipczuk, L. N., Igaz, L. M., Cammarota, M., Izquierdo, I. and Medina, J. H. (2007). mTOR signaling in the hippocampus is necessary for memory formation. *Neurobiology of Learning and Memory* 87, 303–307.
- Bray, N. L., Pimentel, H., Melsted, P. and Pachter, L. (2016). Near-optimal probabilistic RNA-seq quantification. *Nat Biotechnol* 34, 525–527.
- Bulfone, A., Martinez, S., Marigo, V., Campanella, M., Basile, A., Quaderi, N., Gattuso, C., Rubenstein, J. L. R. and Ballabio, A. (1999). Expression pattern of the Tbr2 (Eomesodermin) gene during mouse and chick brain development. *Mechanisms of Development* 84, 133–138.

651 Burgess, N., Maguire, E. A. and O'Keefe, J. (2002). The Human Hippocampus and Spatial and Episodic  
652 Memory. *Neuron* 35, 625–641.

653 Chen, X., Wang, S., Zhou, Y., Han, Y., Li, S., Xu, Q., Xu, L., Zhu, Z., Deng, Y., Yu, L., et al. (2018). Phf8  
654 histone demethylase deficiency causes cognitive impairments through the mTOR pathway. *Nat*  
655 *Commun* 9, 114.

656 Cheval, H., Chagneau, C., Levasseur, G., Veyrac, A., Faucon-Biguët, N., Laroche, S. and Davis, S. (2012).  
657 Distinctive features of Egr transcription factor regulation and DNA binding activity in CA1 of the  
658 hippocampus in synaptic plasticity and consolidation and reconsolidation of fear memory.  
659 *Hippocampus* 22, 631–642.

660 Chuong, E. B., Rumi, M. A. K., Soares, M. J. and Baker, J. C. (2013). Endogenous retroviruses function as  
661 species-specific enhancer elements in the placenta. *Nat Genet* 45, 325–329.

662 Chuong, E. B., Elde, N. C. and Feschotte, C. (2016). Regulatory evolution of innate immunity through co-  
663 option of endogenous retroviruses. *Science* 351, 1083–1087.

664 Cipriani, S., Nardelli, J., Verney, C., Delezoide, A.-L., Guimiot, F., Gressens, P. and Adle-Biassette, H.  
665 (2016). Dynamic Expression Patterns of Progenitor and Pyramidal Neuron Layer Markers in the  
666 Developing Human Hippocampus. *Cereb. Cortex* 26, 1255–1271.

667 Coluccio, A., Ecco, G., Duc, J., Offner, S., Turelli, P. and Trono, D. (2018). Individual retrotransposon  
668 integrants are differentially controlled by KZFP/KAP1-dependent histone methylation, DNA  
669 methylation and TET-mediated hydroxymethylation in naïve embryonic stem cells. *Epigenetics &*  
670 *Chromatin* 11, 7.

671 Cosby, R. L., Judd, J., Zhang, R., Zhong, A., Garry, N., Pritham, E. J. and Feschotte, C. (2021). Recurrent  
672 evolution of vertebrate transcription factors by transposase capture. *Science* 371, eabc6405.

673 Coufal, N. G., Garcia-Perez, J. L., Peng, G. E., Yeo, G. W., Mu, Y., Lovci, M. T., Morell, M., O'Shea, K. S.,  
674 Moran, J. V. and Gage, F. H. (2009). L1 retrotransposition in human neural progenitor cells.  
675 *Nature* 460, 1127–1131.

676 Crawley, J. N., Heyer, W.-D. and LaSalle, J. M. (2016). Autism and Cancer Share Risk Genes, Pathways,  
677 and Drug Targets. *Trends in Genetics* 32, 139–146.

678 Datson, N. a., Morsink, M. c., Steenbergen, P. j., Aubert, Y., Schlumbohm, C., Fuchs, E. and de Kloet, E. r.  
679 (2009). A molecular blueprint of gene expression in hippocampal subregions CA1, CA3, and DG is  
680 conserved in the brain of the common marmoset. *Hippocampus* 19, 739–752.

681 Davis, L., Onn, I. and Elliott, E. (2018). The emerging roles for the chromatin structure regulators CTCF  
682 and cohesin in neurodevelopment and behavior. *Cell. Mol. Life Sci.* 75, 1205–1214.

683 del Rosario, R. C. H., Rayan, N. A. and Prabhakar, S. (2014). Noncoding origins of anthropoid traits and a  
684 new null model of transposon functionalization. *Genome Res* 24, 1469–1484.

685 Du, J., Leung, A., Trac, C., Lee, M., Parks, B. W., Lusis, A. J., Natarajan, R. and Schones, D. E. (2016).  
686 Chromatin variation associated with liver metabolism is mediated by transposable elements.  
687 *Epigenetics & Chromatin* 9, 28.

688 Duyckaerts, C., Delatour, B. and Potier, M.-C. (2009). Classification and basic pathology of Alzheimer  
689 disease. *Acta Neuropathol* 118, 5–36.

690 Edler, M. K., Sherwood, C. C., Meindl, R. S., Hopkins, W. D., Ely, J. J., Erwin, J. M., Mufson, E. J., Hof, P. R.  
691 and Raghanti, M. A. (2017). Aged chimpanzees exhibit pathologic hallmarks of Alzheimer’s  
692 disease. *Neurobiology of Aging* 59, 107–120.

693 Eichenbaum, H. (2017a). The role of the hippocampus in navigation is memory. *Journal of*  
694 *Neurophysiology* 117, 1785–1796.

695 Eichenbaum, H. (2017b). Prefrontal–hippocampal interactions in episodic memory. *Nat Rev Neurosci* 18,  
696 547–558.

697 Emera, D., Yin, J., Reilly, S. K., Gockley, J. and Noonan, J. P. (2016). Origin and evolution of  
698 developmental enhancers in the mammalian neocortex. *PNAS* 113, E2617–E2626.

699 Enard, W. (2011). FOXP2 and the role of cortico-basal ganglia circuits in speech and language evolution.  
700 *Current Opinion in Neurobiology* 21, 415–424.

701 Enard, W., Khaitovich, P., Klose, J., Zöllner, S., Heissig, F., Giavalisco, P., Nieselt-Struwe, K., Muchmore,  
702 E., Varki, A., Ravid, R., et al. (2002). Intra- and Interspecific Variation in Primate Gene Expression  
703 Patterns. *Science* 296, 340–343.

704 Englund, C. (2005). Pax6, Tbr2, and Tbr1 Are Expressed Sequentially by Radial Glia, Intermediate  
705 Progenitor Cells, and Postmitotic Neurons in Developing Neocortex. *Journal of Neuroscience* 25,  
706 247–251.

707 Ferrón, S. R., Charalambous, M., Radford, E., McEwen, K., Wildner, H., Hind, E., Morante-Redolat, J. M.,  
708 Laborda, J., Guillemot, F., Bauer, S. R., et al. (2011). Postnatal loss of Dlk1 imprinting in stem  
709 cells and niche astrocytes regulates neurogenesis. *Nature* 475, 381–385.

710 Finch, C. E. and Austad, S. N. (2015). Commentary: is Alzheimer’s disease uniquely human? *Neurobiology*  
711 *of Aging* 36, 553–555.

712 Florio, M. and Huttner, W. B. (2014). Neural progenitors, neurogenesis and the evolution of the  
713 neocortex. *Development* 141, 2182–2194.

714 Fortress, A. M., Fan, L., Orr, P. T., Zhao, Z. and Frick, K. M. (2013). Estradiol-induced object recognition  
715 memory consolidation is dependent on activation of mTOR signaling in the dorsal hippocampus.  
716 *Learn. Mem.* 20, 147–155.

717 Fuentes, D. R., Swigut, T. and Wysocka, J. (2018). Systematic perturbation of retroviral LTRs reveals  
718 widespread long-range effects on human gene regulation. *eLife* 7, e35989.

Gallego Romero, I., Pavlovic, B. J., Hernando-Herraez, I., Zhou, X., Ward, M. C., Banovich, N. E., Kagan, C. L., Burnett, J. E., Huang, C. H., Mitrano, A., et al. (2015). A panel of induced pluripotent stem cells from chimpanzees: a resource for comparative functional genomics. *eLife* 4, e07103.

Gokhman, D., Agolia, R. M., Kinnebrew, M., Gordon, W., Sun, D., Bajpai, V. K., Naqvi, S., Chen, C., Chan, A., Chen, C., et al. (2021). Human–chimpanzee fused cells reveal cis -regulatory divergence underlying skeletal evolution. *Nature Genetics* 53, 467–476.

Graber, T. E., McCamphill, P. K. and Sossin, W. S. (2013). A recollection of mTOR signaling in learning and memory. *Learn. Mem.* 20, 518–530.

Hevner, R. F. (2019). Intermediate progenitors and Tbr2 in cortical development. *J. Anat.* 235, 616–625.

Hickey, S. L., Berto, S. and Konopka, G. (2019). Chromatin Decondensation by FOXP2 Promotes Human Neuron Maturation and Expression of Neurodevelopmental Disease Genes. *Cell Reports* 27, 1699-1711.e9.

Hodge, R. D., Nelson, B. R., Kahoud, R. J., Yang, R., Mussar, K. E., Reiner, S. L. and Hevner, R. F. (2012). Tbr2 Is Essential for Hippocampal Lineage Progression from Neural Stem Cells to Intermediate Progenitors and Neurons. *Journal of Neuroscience* 32, 6275–6287.

Ito, J., Kimura, I., Soper, A., Coudray, A., Koyanagi, Y., Nakaoka, H., Inoue, I., Turelli, P., Trono, D. and Sato, K. Endogenous retroviruses drive KRAB zinc-finger protein family expression for tumor suppression. *Science Advances* 6, eabc3020.

Ivancevic, A. and Chuong, E. B. (2020). Transposable elements teach T cells new tricks. *PNAS* 117, 9145–9147.

Jacques, P.-É., Jeyakani, J. and Bourque, G. (2013). The Majority of Primate-Specific Regulatory Sequences Are Derived from Transposable Elements. *PLOS Genetics* 9, e1003504.

Jönsson, M. E., Ludvik Brattås, P., Gustafsson, C., Petri, R., Yudovich, D., Piracs, K., Verschuere, S., Madsen, S., Hansson, J., Larsson, J., et al. (2019). Activation of neuronal genes via LINE-1 elements upon global DNA demethylation in human neural progenitors. *Nat Commun* 10, 3182.

Judd, J., Sanderson, H. and Feschotte, C. (2021). Evolution of mouse circadian enhancers from transposable elements. *Genome Biol* 22, 193.

Kamboh, M. I., Fan, K.-H., Yan, Q., Beer, J. C., Snitz, B. E., Wang, X., Chang, C.-C. H., Demirci, F. Y., Feingold, E. and Ganguli, M. (2019). Population-based genome-wide association study of cognitive decline in older adults free of dementia: identification of a novel locus for the attention domain. *Neurobiol Aging* 84, 239.e15-239.e24.

Kimura, N., Nakashima, K., Ueno, M., Kiyama, H. and Taga, T. (1999). A novel mammalian T-box-containing gene, Tbr2, expressed in mouse developing brain. *Developmental Brain Research* 115, 183–193.

King, M. and Wilson, A. (1975). Evolution at two levels in humans and chimpanzees. *Science* 188, 107–116.

755 Kittappa, R., Chang, W. W., Awatramani, R. B. and McKay, R. D. G. (2007). The *foxa2* Gene Controls the  
756 Birth and Spontaneous Degeneration of Dopamine Neurons in Old Age. *PLOS Biology* 5, e325.

757 Kohane, A. A. and Wood, T. R. (2021). *Neurodevelopmental clustering of gene expression identifies lipid*  
758 *metabolism genes associated with neuroprotection and neurodegeneration*.

759 Kolehmainen, J., Black, G. C. M., Saarinen, A., Chandler, K., Clayton-Smith, J., Träskelin, A.-L., Perveen, R.,  
760 Kivitie-Kallio, S., Norio, R., Warburg, M., et al. (2003). Cohen syndrome is caused by mutations in  
761 a novel gene, COH1, encoding a transmembrane protein with a presumed role in vesicle-  
762 mediated sorting and intracellular protein transport. *Am J Hum Genet* 72, 1359–1369.

763 Liégeois, F. J., Hildebrand, M. S., Bonthron, A., Turner, S. J., Scheffer, I. E., Bahlo, M., Connelly, A. and  
764 Morgan, A. T. (2016). Early neuroimaging markers of FOXP2 intragenic deletion. *Sci Rep* 6,  
765 35192.

766 Love, M. I., Huber, W. and Anders, S. (2014). Moderated estimation of fold change and dispersion for  
767 RNA-seq data with DESeq2. *Genome Biology* 15, 550.

768 Lynch, V. J., Leclerc, R. D., May, G. and Wagner, G. P. (2011). Transposon-mediated rewiring of gene  
769 regulatory networks contributed to the evolution of pregnancy in mammals. *Nat Genet* 43,  
770 1154–1159.

771 Lynch, V. J., Nnamani, M. C., Kapusta, A., Brayer, K., Plaza, S. L., Mazur, E. C., Emera, D., Sheikh, S. Z.,  
772 Grützner, F., Bauersachs, S., et al. (2015). Ancient Transposable Elements Transformed the  
773 Uterine Regulatory Landscape and Transcriptome during the Evolution of Mammalian  
774 Pregnancy. *Cell Rep* 10, 551–561.

775 MacDermot, K. D., Bonora, E., Sykes, N., Coupe, A.-M., Lai, C. S. L., Vernes, S. C., Vargha-Khadem, F.,  
776 McKenzie, F., Smith, R. L., Monaco, A. P., et al. (2005). Identification of FOXP2 Truncation as a  
777 Novel Cause of Developmental Speech and Language Deficits. *The American Journal of Human*  
778 *Genetics* 76, 1074–1080.

779 Mandal, C., Jung, K. H., Kang, S. C., Choi, M. R., Park, K. S., Chung, I. Y. and Chai, Y. G. (2015). Knocking  
780 down of UTX in NCCIT cells enhance cell attachment and promote early neuronal cell  
781 differentiation. *BioChip J* 9, 182–193.

782 Marchetto, M. C., Hrvoj-Mihic, B., Kerman, B. E., Yu, D. X., Vadodaria, K. C., Linker, S. B., Narvaiza, I.,  
783 Santos, R., Denli, A. M., Mendes, A. P., et al. (2019). Species-specific maturation profiles of  
784 human, chimpanzee and bonobo neural cells. *eLife* 8, e37527.

785 Martínez-Cerdeño, V., Noctor, S. C. and Kriegstein, A. R. (2006). The role of intermediate progenitor cells  
786 in the evolutionary expansion of the cerebral cortex. *Cereb Cortex* 16 Suppl 1, i152-161.

787 Mathys, H., Davila-Velderrain, J., Peng, Z., Gao, F., Mohammadi, S., Young, J. Z., Menon, M., He, L.,  
788 Abdurrob, F., Jiang, X., et al. (2019). Single-cell transcriptomic analysis of Alzheimer’s disease.  
789 *Nature* 570, 332–337.

790 Miao, B., Fu, S., Lyu, C., Gontarz, P., Wang, T. and Zhang, B. (2020). Tissue-specific usage of transposable  
791 element-derived promoters in mouse development. *Genome Biol* 21, 255.



792 Mihalas, A. B., Elsen, G. E., Bedogni, F., Daza, R. A. M., Ramos-Laguna, K. A., Arnold, S. J. and Hevner, R.  
793 F. (2016). Intermediate Progenitor Cohorts Differentially Generate Cortical Layers and Require  
794 Tbr2 for Timely Acquisition of Neuronal Subtype Identity. *Cell Reports* 16, 92–105.

795 Mika, K., Marinić, M., Singh, M., Muter, J., Brosens, J. J. and Lynch, V. J. (2021). Evolutionary  
796 transcriptomics implicates new genes and pathways in human pregnancy and adverse  
797 pregnancy outcomes. *eLife* 10, e69584.

798 Modzelewski, A. J., Shao, W., Chen, J., Lee, A., Qi, X., Noon, M., Tjokro, K., Sales, G., Biton, A., Anand, A.,  
799 et al. (2021). A mouse-specific retrotransposon drives a conserved Cdk2ap1 isoform essential for  
800 development. *Cell* 184, 5541–5558.e22.

801 Mora-Bermúdez, F., Badsha, F., Kanton, S., Camp, J. G., Vernot, B., Köhler, K., Voigt, B., Okita, K., Maricic,  
802 T., He, Z., et al. (2016). Differences and similarities between human and chimpanzee neural  
803 progenitors during cerebral cortex development. *eLife* 5, e18683.

804 Mukherjee, D., Gonzales, B. J., Ashwal-Fluss, R., Turm, H., Groysman, M. and Citri, A. (2021). Egr2  
805 induction in spiny projection neurons of the ventrolateral striatum contributes to cocaine place  
806 preference in mice. *eLife* 10, e65228.

807 Okhovat, M., Nevonen, K. A., Davis, B. A., Michener, P., Ward, S., Milhaven, M., Harshman, L., Sohota, A.,  
808 Fernandes, J. D., Salama, S. R., et al. (2020). Co-option of the lineage-specific LAVA  
809 retrotransposon in the gibbon genome. *PNAS* 117, 19328–19338.

810 Pagliaroli, L., Porazzi, P., Curtis, A. T., Scopa, C., Mikkers, H. M. M., Freund, C., Daxinger, L., Deliard, S.,  
811 Welsh, S. A., Offley, S., et al. (2021). Inability to switch from ARID1A-BAF to ARID1B-BAF impairs  
812 exit from pluripotency and commitment towards neural crest formation in ARID1B-related  
813 neurodevelopmental disorders. *Nat Commun* 12, 6469.

814 Pashos, E. E., Park, Y., Wang, X., Raghavan, A., Yang, W., Abbey, D., Peters, D. T., Arbelaez, J., Hernandez,  
815 M., Kuperwasser, N., et al. (2017). Large, Diverse Population Cohorts of hiPSCs and Derived  
816 Hepatocyte-like Cells Reveal Functional Genetic Variation at Blood Lipid-Associated Loci. *Cell*  
817 *Stem Cell* 20, 558–570.e10.

818 Playfoot, C. J., Duc, J., Sheppard, S., Dind, S., Coudray, A., Planet, E. and Trono, D. (2021). Transposable  
819 elements and their KZFP controllers are drivers of transcriptional innovation in the developing  
820 human brain. *Genome Res.* 31, 1531–1545.

821 Poirier, R., Cheval, H., Mailhes, C., Charnay, P., Davis, S. and Laroche, S. (2007). Paradoxical Role of an  
822 Egr Transcription Factor Family Member, Egr2/Krox20, in Learning and Memory. *Front Behav*  
823 *Neurosci* 1, 6.

824 Pontious, A., Kowalczyk, T., Englund, C. and Hevner, R. F. (2008). Role of intermediate progenitor cells in  
825 cerebral cortex development. *Dev Neurosci* 30, 24–32.

826 Pontis, J., Planet, E., Offner, S., Turelli, P., Duc, J., Coudray, A., Theunissen, T. W., Jaenisch, R. and Trono,  
827 D. (2019). Hominoid-Specific Transposable Elements and KZFPs Facilitate Human Embryonic  
828 Genome Activation and Control Transcription in Naive Human ESCs. *Cell Stem Cell* 24, 724–  
829 735.e5.

830 Quinlan, A. R. and Hall, I. M. (2010). BEDTools: a flexible suite of utilities for comparing genomic  
831 features. *Bioinformatics* 26, 841–842.

832 Quinn, J. P. and Bubbs, V. J. (2014). SVA retrotransposons as modulators of gene expression. *Mobile*  
833 *Genetic Elements* 4, e32102.

834 Raivich, G. (2008). c-Jun expression, activation and function in neural cell death, inflammation and  
835 repair. *J Neurochem* 107, 898–906.

836 Raivich, G. and Behrens, A. (2006). Role of the AP-1 transcription factor c-Jun in developing, adult and  
837 injured brain. *Prog Neurobiol* 78, 347–363.

838 Rayan, N. A., Del Rosario, R. C. H. and Prabhakar, S. (2016). Massive contribution of transposable  
839 elements to mammalian regulatory sequences. *Semin Cell Dev Biol* 57, 51–56.

840 Reilly, S. K., Yin, J., Ayoub, A. E., Emera, D., Leng, J., Cotney, J., Sarro, R., Rakic, P. and Noonan, J. P.  
841 (2015). Evolutionary genomics. Evolutionary changes in promoter and enhancer activity during  
842 human corticogenesis. *Science* 347, 1155–1159.

843 Rétaux, S., Bourrat, F., Joly, J.-S. and Hinaux, H. (2013). Perspectives in Evo-Devo of the Vertebrate Brain.  
844 In *Advances in Evolutionary Developmental Biology*, pp. 151–172. John Wiley & Sons, Ltd.

845 Reuter, M. S., Krumbiegel, M., Schlüter, G., Ekici, A. B., Reis, A. and Zweier, C. (2017). Haploinsufficiency  
846 of NR4A2 is associated with a neurodevelopmental phenotype with prominent language  
847 impairment. *Am J Med Genet A* 173, 2231–2234.

848 Sakamoto, K., Karelina, K. and Obrietan, K. (2011). CREB: a multifaceted regulator of neuronal plasticity  
849 and protection. *Journal of Neurochemistry* 116, 1–9.

850 Sarkar, A., Mei, A., Paquola, A. C. M., Stern, S., Bardy, C., Klug, J. R., Kim, S., Neshat, N., Kim, H. J., Ku, M.,  
851 et al. (2018). Efficient Generation of CA3 Neurons from Human Pluripotent Stem Cells Enables  
852 Modeling of Hippocampal Connectivity In Vitro. *Cell Stem Cell* 22, 684–697.e9.

853 Schmidt, D., Schwalie, P. C., Wilson, M. D., Ballester, B., Gonçalves, A., Kutter, C., Brown, G. D., Marshall,  
854 A., Flicek, P. and Odom, D. T. (2012). Waves of retrotransposon expansion remodel genome  
855 organization and CTCF binding in multiple mammalian lineages. *Cell* 148, 335–348.

856 Sessa, A., Mao, C.-A., Hadjantonakis, A.-K., Klein, W. H. and Broccoli, V. (2008). Tbr2 directs conversion  
857 of radial glia into basal precursors and guides neuronal amplification by indirect neurogenesis in  
858 the developing neocortex. *Neuron* 60, 56–69.

859 Shah, A. H., Gilbert, M., Ivan, M. E., Komotar, R. J., Heiss, J. and Nath, A. (2021). The role of human  
860 endogenous retroviruses in gliomas: from etiological perspectives and therapeutic implications.  
861 *Neuro-Oncology* 23, 1647–1655.

862 Sin, C., Li, H. and Crawford, D. A. (2015). Transcriptional Regulation by FOXP1, FOXP2, and FOXP4  
863 Dimerization. *Journal of Molecular Neuroscience* 55, 437–448.

864 Sousa, A. M. M., Zhu, Y., Raghanti, M. A., Kitchen, R. R., Onorati, M., Tebbenkamp, A. T. N., Stutz, B.,  
865 Meyer, K. A., Li, M., Kawasawa, Y. I., et al. (2017). Molecular and cellular reorganization of neural  
866 circuits in the human lineage. *Science* 358, 1027–1032.

867 Squire, L. R. (1992). Memory and the Hippocampus: A Synthesis From Findings With Rats, Monkeys, and  
868 Humans.

869 Sundaram, V. and Wysocka, J. (2020). Transposable elements as a potent source of diverse cis-  
870 regulatory sequences in mammalian genomes. *Philosophical Transactions of the Royal Society B:*  
871 *Biological Sciences* 375, 20190347.

872 Sundaram, V., Cheng, Y., Ma, Z., Li, D., Xing, X., Edge, P., Snyder, M. P. and Wang, T. (2014). Widespread  
873 contribution of transposable elements to the innovation of gene regulatory networks. *Genome*  
874 *Res* 24, 1963–1976.

875 Sur, D., Kustwar, R. K., Budania, S., Mahadevan, A., Hancks, D. C., Yadav, V., Shankar, S. K. and Mandal, P.  
876 K. (2017). Detection of the LINE-1 retrotransposon RNA-binding protein ORF1p in different  
877 anatomical regions of the human brain. *Mobile DNA* 8, 17.

878 Taher, N., McKenzie, C., Garrett, R., Baker, M., Fox, N. and Isaacs, G. D. (2014). Amyloid- $\beta$  Alters the DNA  
879 Methylation Status of Cell-fate Genes in an Alzheimer's Disease Model. *Journal of Alzheimer's*  
880 *Disease* 38, 831–844.

881 Thomas, C. A., Paquola, A. C. M. and Muotri, A. R. (2012). LINE-1 Retrotransposition in the Nervous  
882 System. *Annual Review of Cell and Developmental Biology* 28, 555–573.

883 Tokuyama, M., Kong, Y., Song, E., Jayewickreme, T., Kang, I. and Iwasaki, A. (2018). ERVmap analysis  
884 reveals genome-wide transcription of human endogenous retroviruses. *PNAS* 115, 12565–  
885 12572.

886 Tomasello, M. and Herrmann, E. (2010). Ape and Human Cognition: What's the Difference? *Current*  
887 *Directions in Psychological Science* 19, 3–8.

888 Trizzino, M., Park, Y., Holsbach-Beltrame, M., Aracena, K., Mika, K., Caliskan, M., Perry, G. H., Lynch, V. J.  
889 and Brown, C. D. (2017). Transposable elements are the primary source of novelty in primate  
890 gene regulation. *Genome Res.*

891 Trizzino, M., Kapusta, A. and Brown, C. D. (2018). Transposable elements generate regulatory novelty in  
892 a tissue-specific fashion. *BMC Genomics* 19, 468.

893 Turelli, P., Playfoot, C., Grun, D., Raclot, C., Pontis, J., Coudray, A., Thorball, C., Duc, J., Pankevich, E. V.,  
894 Deplancke, B., et al. (2020). Primate-restricted KRAB zinc finger proteins and target  
895 retrotransposons control gene expression in human neurons. *Science Advances* 6, eaba3200.

896 Walker, L. C. and Jucker, M. (2017). The Exceptional Vulnerability of Humans to Alzheimer's Disease.  
897 *Trends in Molecular Medicine* 23, 534–545.

898 Wang, H., Xing, J., Grover, D., Hedges, D. J., Han, K., Walker, J. A. and Batzer, M. A. (2005). SVA Elements:  
899 A Hominid-specific Retroposon Family. *Journal of Molecular Biology* 354, 994–1007.

- Ward, M. C., Zhao, S., Luo, K., Pavlovic, B. J., Karimi, M. M., Stephens, M. and Gilad, Y. (2018). Silencing of transposable elements may not be a major driver of regulatory evolution in primate iPSCs. *eLife* 7, e33084.
- Wei, Y. (2020). Comparative transcriptome analysis of the hippocampus from sleep-deprived and Alzheimer's disease mice. *Genet Mol Biol* 43, e20190052.
- Wray, G. A. (2007). The evolutionary significance of cis-regulatory mutations. *Nat Rev Genet* 8, 206–216.
- Xie, M., Hong, C., Zhang, B., Lowdon, R. F., Xing, X., Li, D., Zhou, X., Lee, H. J., Maire, C. L., Ligon, K. L., et al. (2013). DNA hypomethylation within specific transposable element families associates with tissue-specific enhancer landscape. *Nat Genet* 45, 836–841.
- Yang, W., Liu, Y., Slovik, K. J., Wu, J. C., Duncan, S. A., Rader, D. J. and Morrissey, E. E. (2015). Generation of iPSCs as a Pooled Culture Using Magnetic Activated Cell Sorting of Newly Reprogrammed Cells. *PLoS One* 10, e0134995.
- Yi, R., Chen, B., Zhao, J., Zhan, X., Zhang, L., Liu, X. and Dong, Q. (2014). Krüppel-like Factor 8 Ameliorates Alzheimer's Disease by Activating  $\beta$ -Catenin. *J Mol Neurosci* 52, 231–241.
- Yu, D. X., Di Giorgio, F. P., Yao, J., Marchetto, M. C., Brennand, K., Wright, R., Mei, A., Mchenry, L., Lisuk, D., Grasmick, J. M., et al. (2014). Modeling Hippocampal Neurogenesis Using Human Pluripotent Stem Cells. *Stem Cell Reports* 2, 295–310.
- Zhang, Y., Liu, T., Meyer, C. A., Eeckhoutte, J., Johnson, D. S., Bernstein, B. E., Nusbaum, C., Myers, R. M., Brown, M., Li, W., et al. (2008). Model-based Analysis of ChIP-Seq (MACS). *Genome Biology* 9, R137.
- Zhang, J., Li, H., Yabut, O., Fitzpatrick, H., D'Arcangelo, G. and Herrup, K. (2010). Cdk5 Suppresses the Neuronal Cell Cycle by Disrupting the E2F1–DP1 Complex. *J. Neurosci.* 30, 5219–5228.
- Zhang, H., Xue, C., Shah, R., Bermingham, K., Hinkle, C. C., Li, W., Rodrigues, A., Tabita-Martinez, J., Millar, J. S., Cuchel, M., et al. (2015). Functional Analysis and Transcriptomic Profiling of iPSC-Derived Macrophages and Their Application in Modeling Mendelian Disease. *Circulation Research* 117, 17–28.
- Zhao, B., Wu, Q., Ye, A. Y., Guo, J., Zheng, X., Yang, X., Yan, L., Liu, Q.-R., Hyde, T. M., Wei, L., et al. (2019). Somatic LINE-1 retrotransposition in cortical neurons and non-brain tissues of Rett patients and healthy individuals. *PLOS Genetics* 15, e1008043.

## Figure legends

**Figure 1** – Differentiation of human and chimpanzee iPSCs into hippocampal intermediate progenitors (A) Western Blot of human differentiated iPSCs against TBR2 (73kDa) at day 0 (iPSCs), day 5, and day 11 of treatment with hpiPC differentiation media. GAPDH is shown as the loading control. (B) Immunofluorescent staining of human and chimpanzee hpiPCs after five days against neurodevelopmental markers PAX6, TBR2 and OTX2. Nuclei are counterstained with DAPI.

**Figure 2 – Differential Gene Expression In Human and Chimpanzee hpiPCs.** (A) Schematic of iPSC differentiation followed by RNA-seq library generation and analysis. (B) Volcano plot depicting “Human UP” genes (right) and “Chimp UP” genes (left) with a log2FoldChange threshold of 1.5 and -1.5, respectively, and a p-value threshold of 0.05. (C) Top upstream regulators of the differentially expressed genes predicted by Ingenuity Pathway Analysis, ranked by -log10(p-value). (D) Heatmaps depicting the expression of genes predicted to be under the control of the transcription factors CREB1, FOXA2 and TBR2 or predicted to play a role in embryonic development. The rows of the heatmaps indicate the transcript names, columns indicate the species, sample number and replicate. “HS1 Rep 1” indicates Homo sapiens sample 1 replicate 1 and “PT2 Rep 2” indicates Pan troglodytes sample 2 replicate 2

**Figure 3 – Human Centric Chromatin Accessibility Analysis.** (A) Schematic of iPSC differentiation followed by ATAC-seq library generation and analysis. (B) UCSC Genome Browser visualization of human ATAC-seq libraries (HS Rep 1, Rep 2, Rep 3) aligned to hg19 genome assembly. (C) Distribution of the differentially accessible (DA) peaks into enhancers or promoters, and into Human UP (greater accessibility in humans) or Chimp UP (greater accessibility in chimpanzees). (D) Differentially accessible chromatin regions ( $p < 0.05$ ,  $n = 3006$ ) are more likely to overlap with transposable elements (TE) than non-differentially accessible regions ( $p > 0.9$ ,  $n = 3,006$ ). (E) The 1335 TE-derived DA regions are more likely to be near a differentially expressed gene, as compared to DA regions that do not overlap a TE. (F) Distribution of the five major TE classes in the human genome, compared with their distribution among the TE-derived DA chromatin regions, and among the TE-derived DA chromatin regions proximal to a differentially expressed gene

**Figure 4 – Chimpanzee Centric Chromatin Accessibility Analysis.** (A) Schematic of iPSC differentiation followed by ATAC-seq library generation and analysis. (B) UCSC Genome Browser visualization of human ATAC-seq libraries (PT Rep 1, Rep 2, Rep 3) aligned to hg19 genome assembly. (C) Distribution of the differentially accessible (DA) peaks into enhancers or promoters, and into Human UP (greater accessibility in humans) or Chimp UP (greater accessibility in chimpanzees). (D) Differentially accessible chromatin regions ( $p < 0.05$ ,  $n = 3,806$ ) are more likely to overlap with transposable elements than other accessible regions ( $p > 0.9$ ,  $n = 3806$ ). (E) Distribution of DA regions that overlap a TE and proximity to genes differentially expressed between human and chimpanzee hpiPCs. (F) Distribution of the five major TE classes in the chimpanzee genome, compared with their distribution among the 1410 TE-derived DA chromatin regions (G) Breakdown of the 20 Miscellaneous TEs represented in the 1,410 TE-derived DA chromatin regions. (H) Distribution of SVA family of TEs in the human genome as compared to their distribution in the TE-derived DA chromatin regions ( $n = 16$ ).

**Figure 5 – LTRs Are Enriched Among Human and Chimpanzee Differentially Accessible Transposons.** (A) Distribution of LTRs compared to non-LTRs in the human genome and in the 1,335 human TE-derived DA regions, with predicted binding motifs. (B) Differentially expressed genes close to the human-enriched DA LTRs. (C) Distribution of LTRs compared to non-LTRs in the chimpanzee genome and in the 1,410 chimpanzee TE-derived DA regions, with predicted binding motifs. (D) Differentially expressed genes close to the chimpanzee-enriched DA LTRs.

**Figure 6 – Human-specific SVAs Bind Tbr2 and Influence Neurodevelopment** (A) The SVAs enriched within the differentially accessible chimpanzee peaks are enriched for binding motifs of neurodevelopmental transcription factors KLF8, ZIC1, and ASCL1 as well as the AP-1 dimer. (B) Human SVAs are enriched for the binding motif of TBR2. (C) Genes proximal to human-specific SVAs are predicted to be regulated by neurodevelopmental TFs and function in important neuronal pathways. (D) 1,816 human SVAs exhibit



ATAC-seq signal in hPIPCs (red = signal, white = noise) and of these, 739 exhibit TBR2 ChIP signal (black = signal, yellow = background). (E) Breakdown of 739 accessible, TBR2 bound SVAs into “human-specific” and “conserved in chimpanzees”. (F) Differentially expressed genes close to the human-specific TBR2-bound SVAs.

**Figure 7** – CRISPR-interference on human SVAs. (A) Treating NCCITs with Retinoic Acid for 7 days leads to induction of TBR2 and PAX6, as shown in qRT-PCR. (B) Treating the RA-NCCIT stable CRISPR line for 72 hours with doxycycline leads to dCas9 activation, as shown in the Cas9 immunoblot. (C) dCas9 activation results in deposition of H3K9me3 at most human SVAs as shown in the H3K9me3 ChIP-seq heatmap. (D) Volcano plot depicting genes differentially expressed upon doxycycline treatment. (E) Venn diagram showing overlap between genes differentially expressed between human and chimpanzee’s hippocampal intermediate progenitors and between RA-NCCITs with and without doxycycline treatment (i.e. with and without SVA repression). (F) Pie chart illustrating the fraction of TBR2-controlled genes that are differentially expressed upon SVA repression in RA-NCCITs.

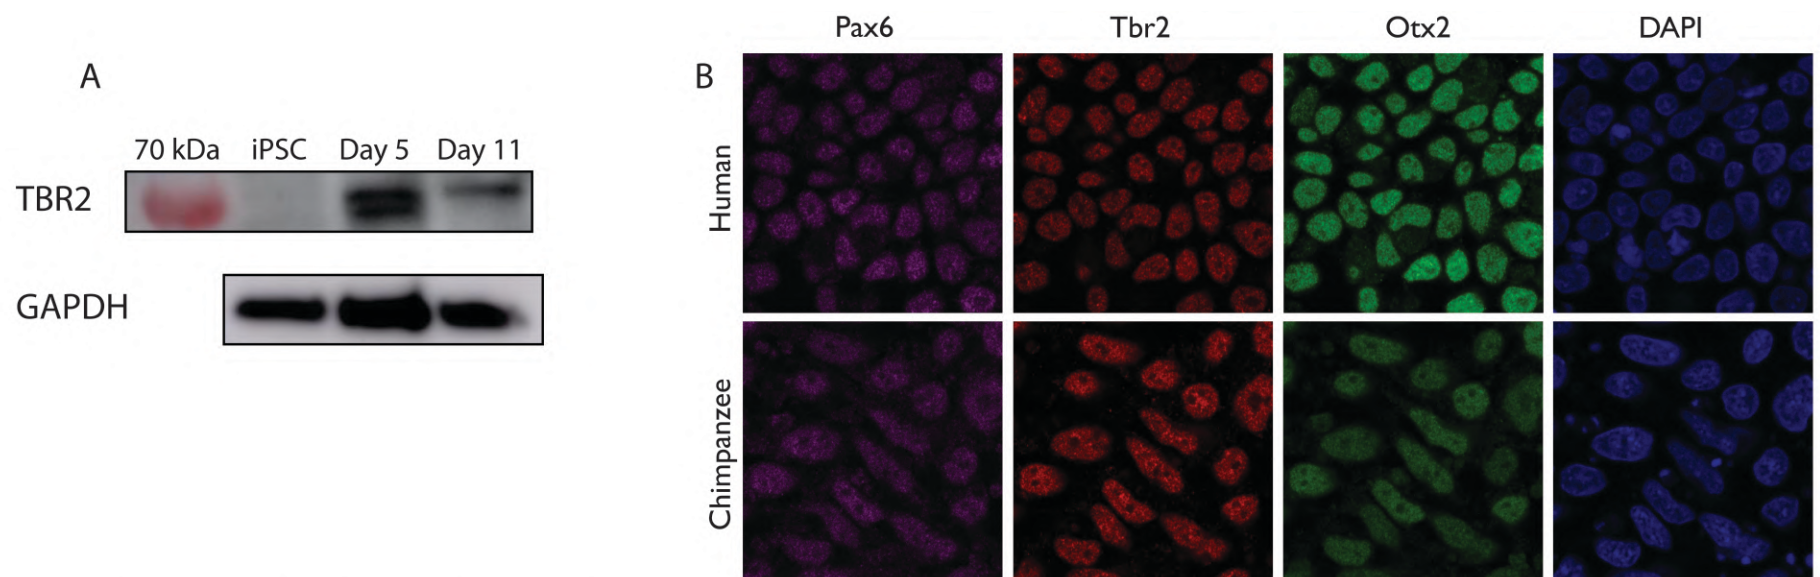

Figure 1 – Differentiation of human and chimpanzee iPSCs into hippocampal intermediate progenitors (A) Western Blot of human differentiated iPSCs against TBR2 (73kDa) at day 0 (iPSCs), day 5, and day 11 of treatment with hPIPC differentiation media. GAPDH is shown as the loading control. (B) Immunofluorescent staining of human and chimpanzee hPIPCs after five days against neurodevelopmental markers PAX6, TBR2 and OTX2. Nuclei are counterstained with DAPI.

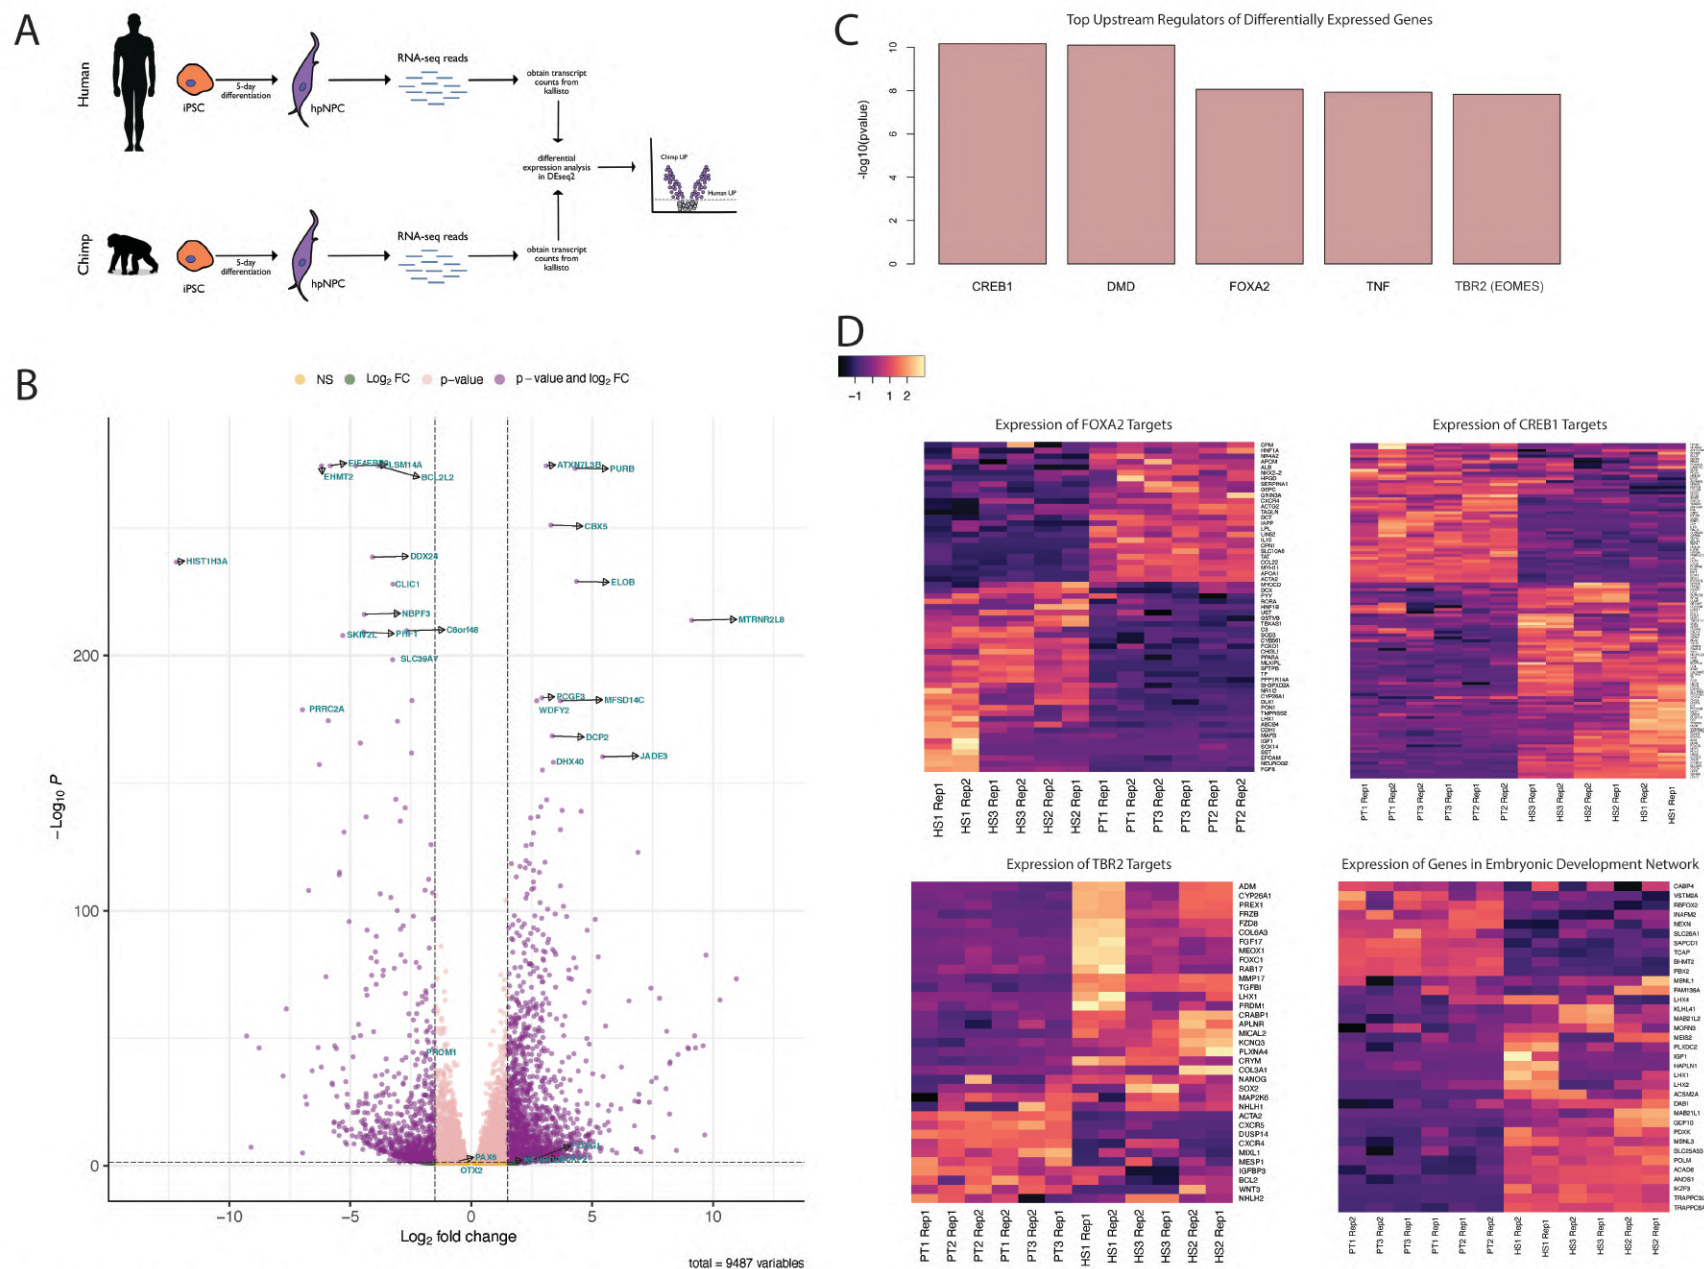

Figure 2 – Differential Gene Expression In Human and Chimpanzee hpNPCs. (A) Schematic of iPSC differentiation followed by RNA-seq library generation and analysis. (B) Volcano plot depicting “Human UP” genes (right) and “Chimp UP” genes (left) with a log2FoldChange threshold of 1.5 and -1.5, respectively, and a p-value threshold of 0.05. (C) Top upstream regulators of the differentially expressed genes predicted by Ingenuity Pathway Analysis, ranked by  $-\log_{10}(p\text{-value})$ . (D) Heatmaps depicting the expression of genes predicted to be under the control of the transcription factors CREB1, FOXA2 and TBR2 or predicted to play a role in embryonic development.



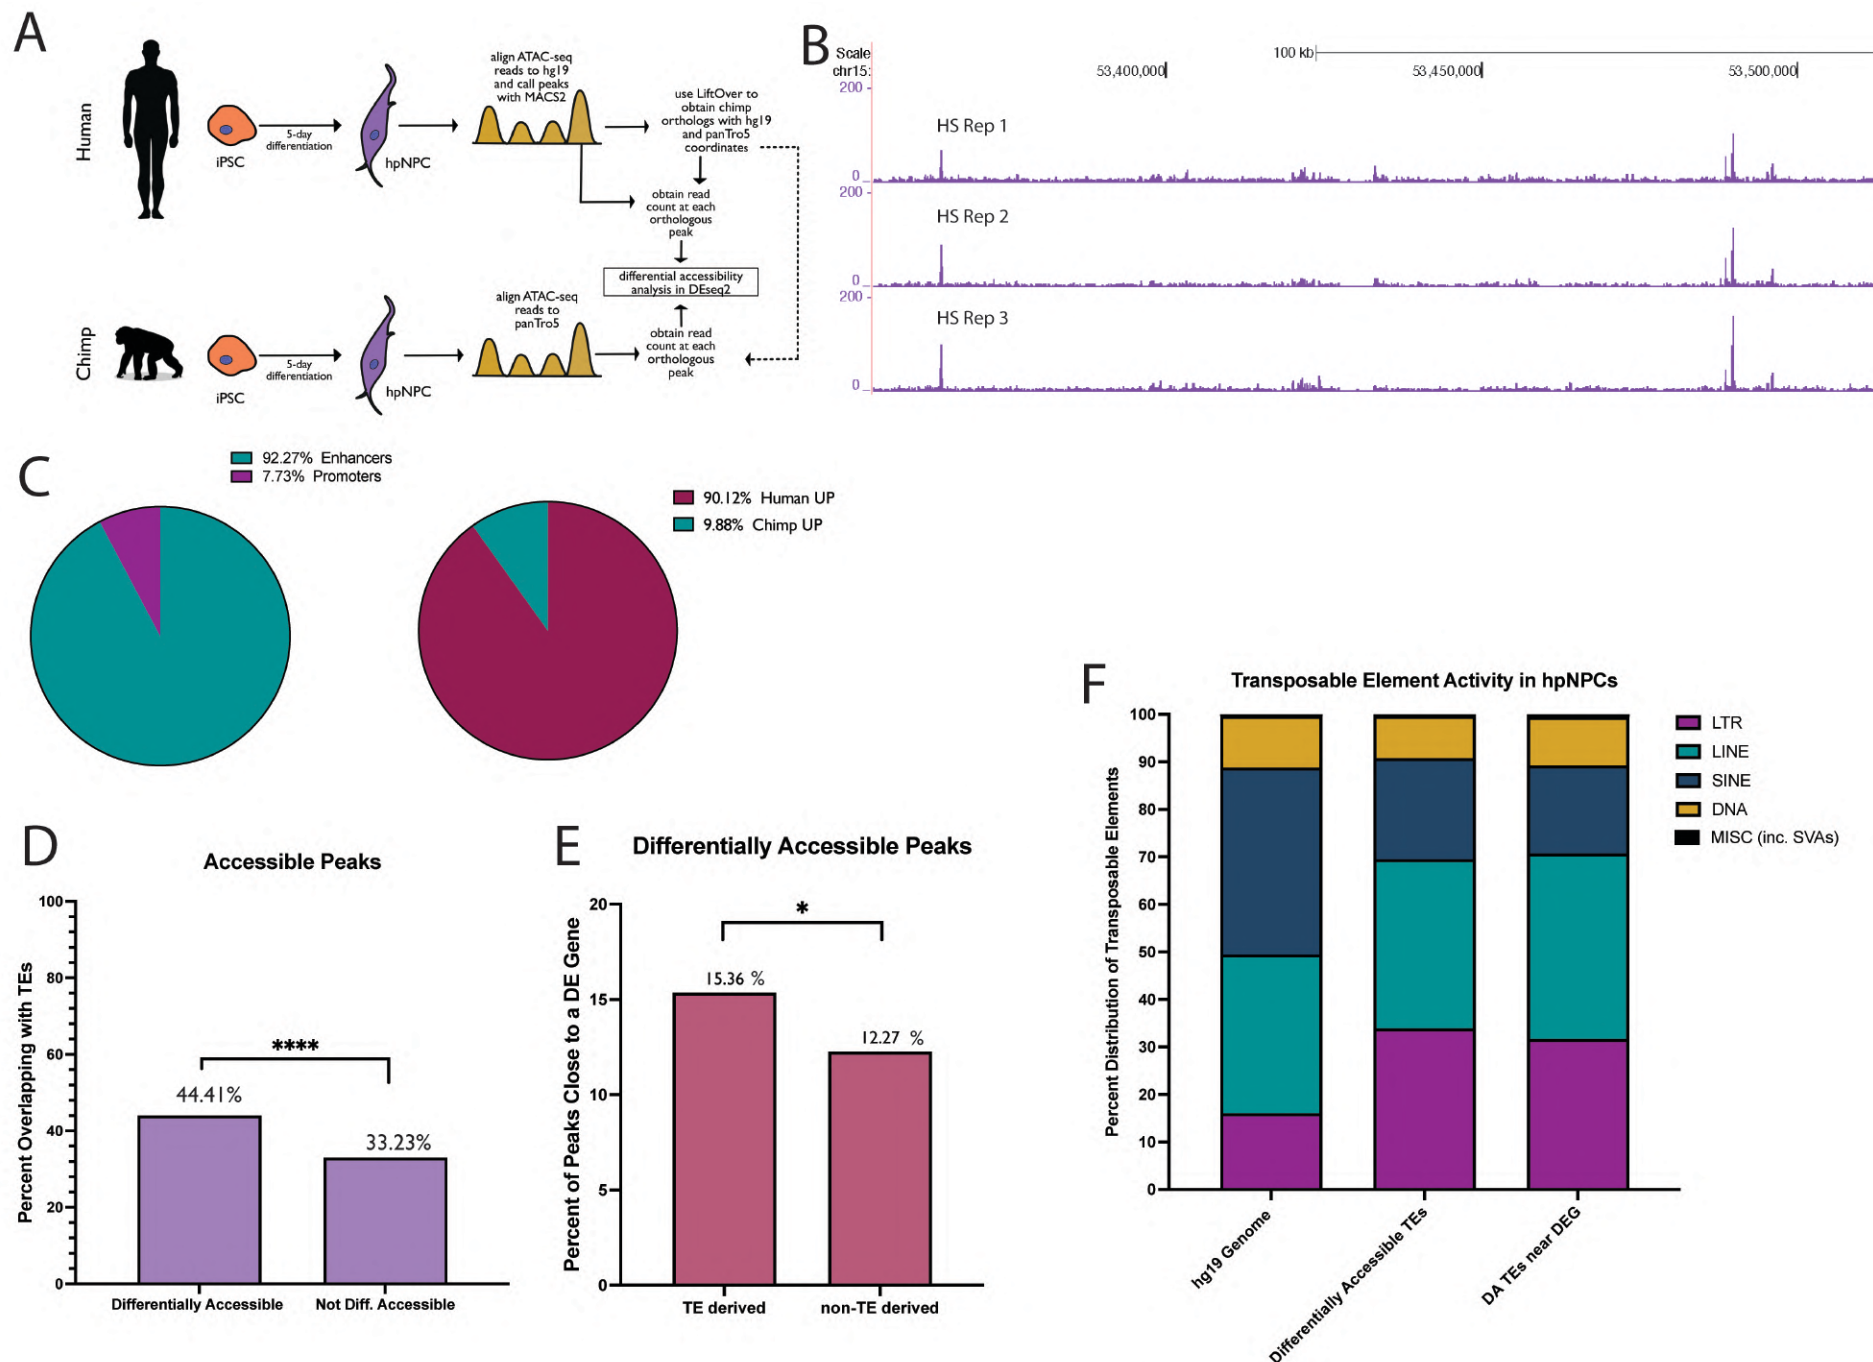

Figure 3 – Human Centric Chromatin Accessibility Analysis. (A) Schematic of iPSC differentiation followed by ATAC-seq library generation and analysis. (B) UCSC Genome Browser visualization of human ATAC-seq libraries (HS Rep 1, Rep 2, Rep 3) aligned to hg19 genome assembly. (C) Distribution of the differentially accessible (DA) peaks into enhancers or promoters, and into Human UP (greater accessibility in humans) or Chimp UP (greater accessibility in chimpanzees). (D) Differentially accessible chromatin regions ( $p < 0.05$ ,  $n = 3006$ ) are more likely to overlap with transposable elements (TE) than non-differentially accessible regions ( $p > 0.9$ ,  $n = 3,006$ ). (E) The 1335 TE-derived DA regions are more likely to be near a differentially expressed gene, as compared to DA regions that do not overlap a TE. (F) Distribution of the five major TE classes in the human genome, compared with their distribution among the TE-derived DA chromatin regions, and among the TE-derived DA chromatin regions proximal to a differentially expressed gene

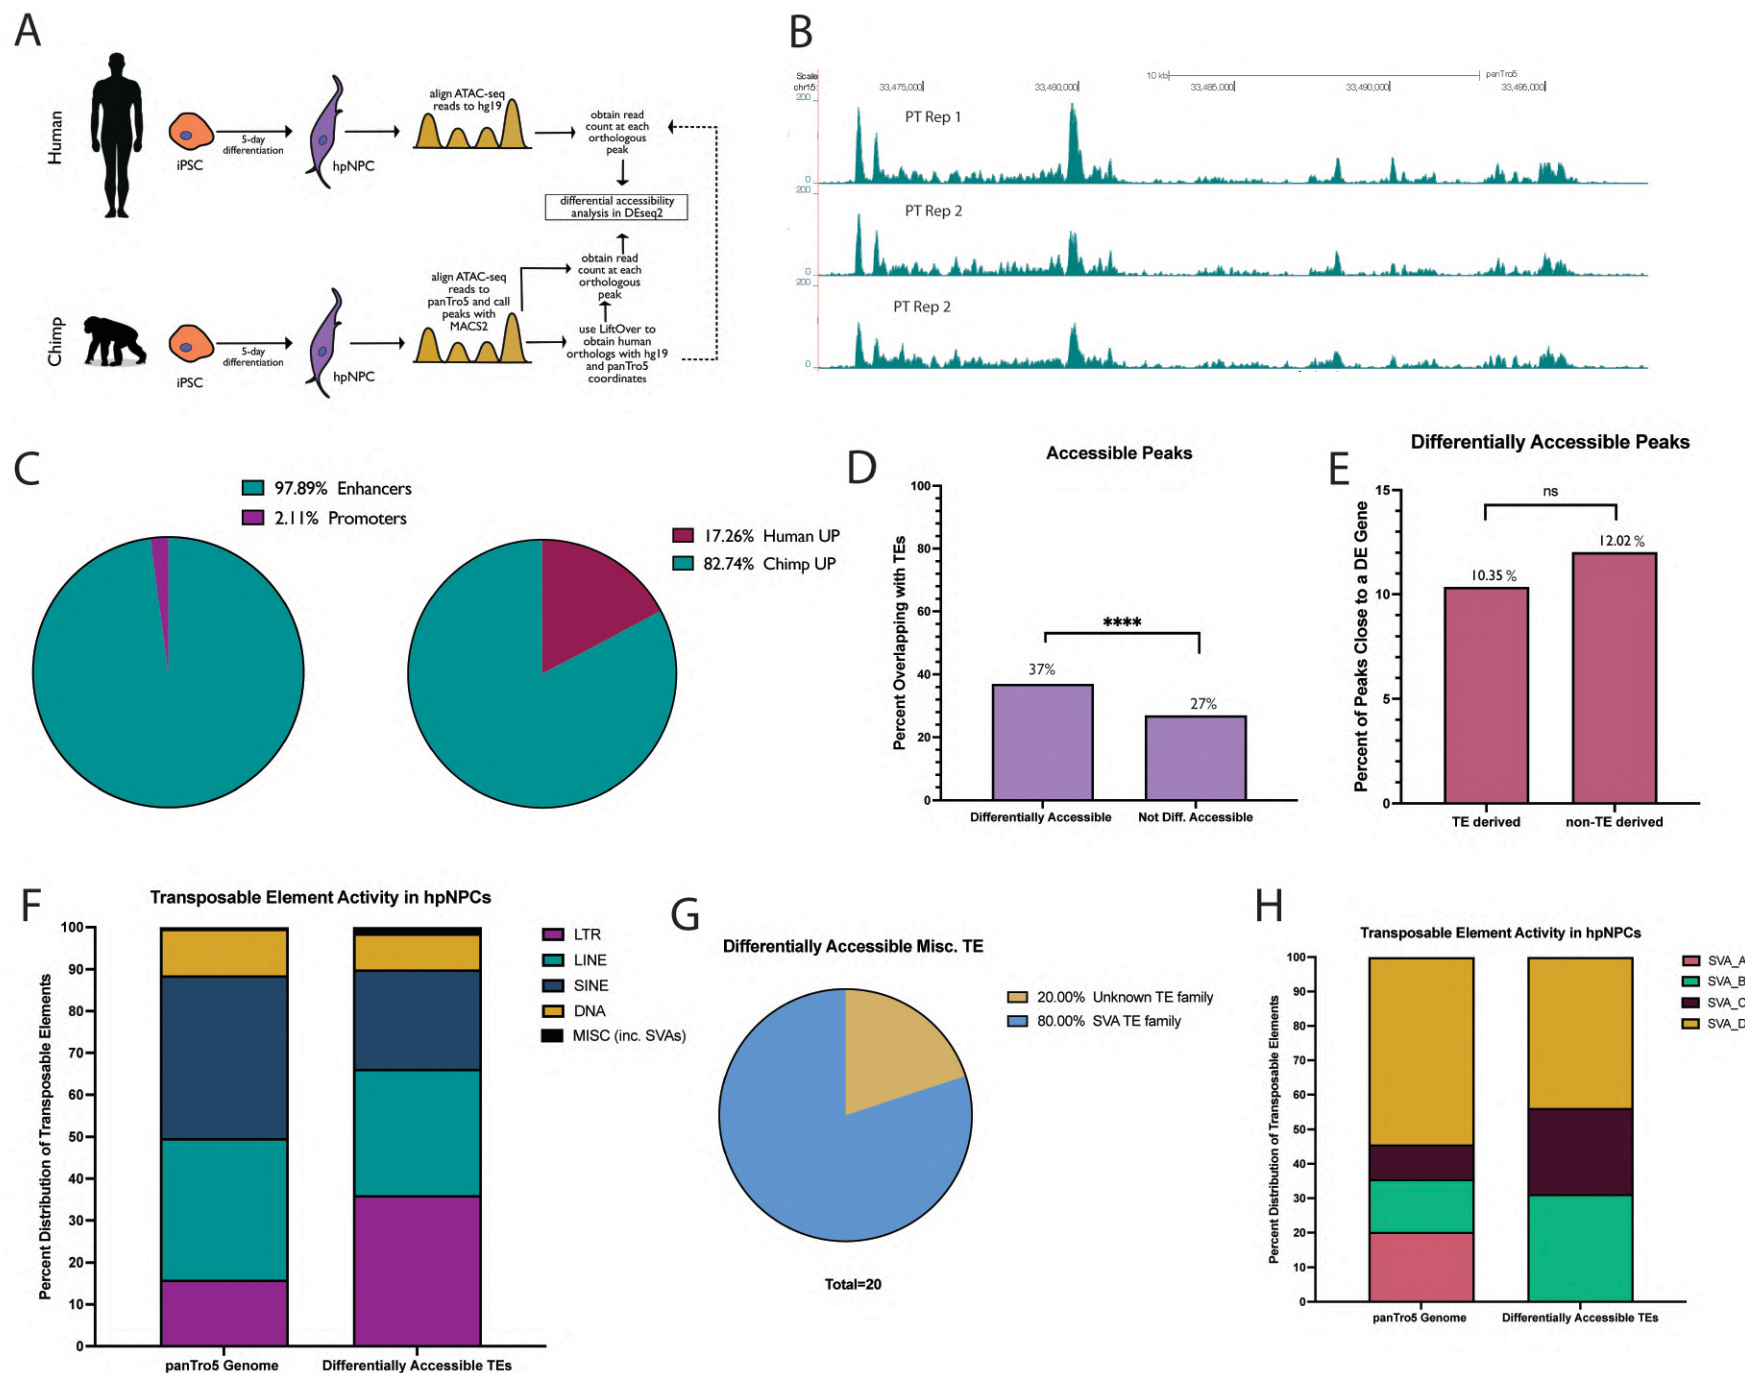

Figure 4 - Chimpanzee Centric Chromatin Accessibility Analysis. (A) Schematic of iPSC differentiation followed by ATAC-seq library generation and analysis. (B) UCSC Genome Browser visualization of human ATAC-seq libraries (PT Rep 1, Rep 2, Rep 3) aligned to hg19 genome assembly. (C) Distribution of the differentially accessible (DA) peaks into enhancers or promoters, and into Human UP (greater accessibility in humans) or Chimp UP (greater accessibility in chimpanzees). (D) Differentially accessible chromatin regions ( $p < 0.05$ ,  $n = 3,806$ ) are more likely to overlap with transposable elements than other accessible regions ( $p > 0.9$ ,  $n = 3806$ ). (E) Distribution of DA regions that overlap a TE and proximity to genes differentially expressed between human and chimpanzee hpNPCs. (F) Distribution of the five major TE classes in the chimpanzee genome, compared with their distribution among the 1410 TE-derived DA chromatin regions (G) Breakdown of the 20 Miscellaneous TEs represented in the 1,410 TE-derived DA chromatin regions. (H) Distribution of SVA family of TEs in the human genome as compared to their distribution in the TE-derived DA chromatin regions ( $n = 16$ ).



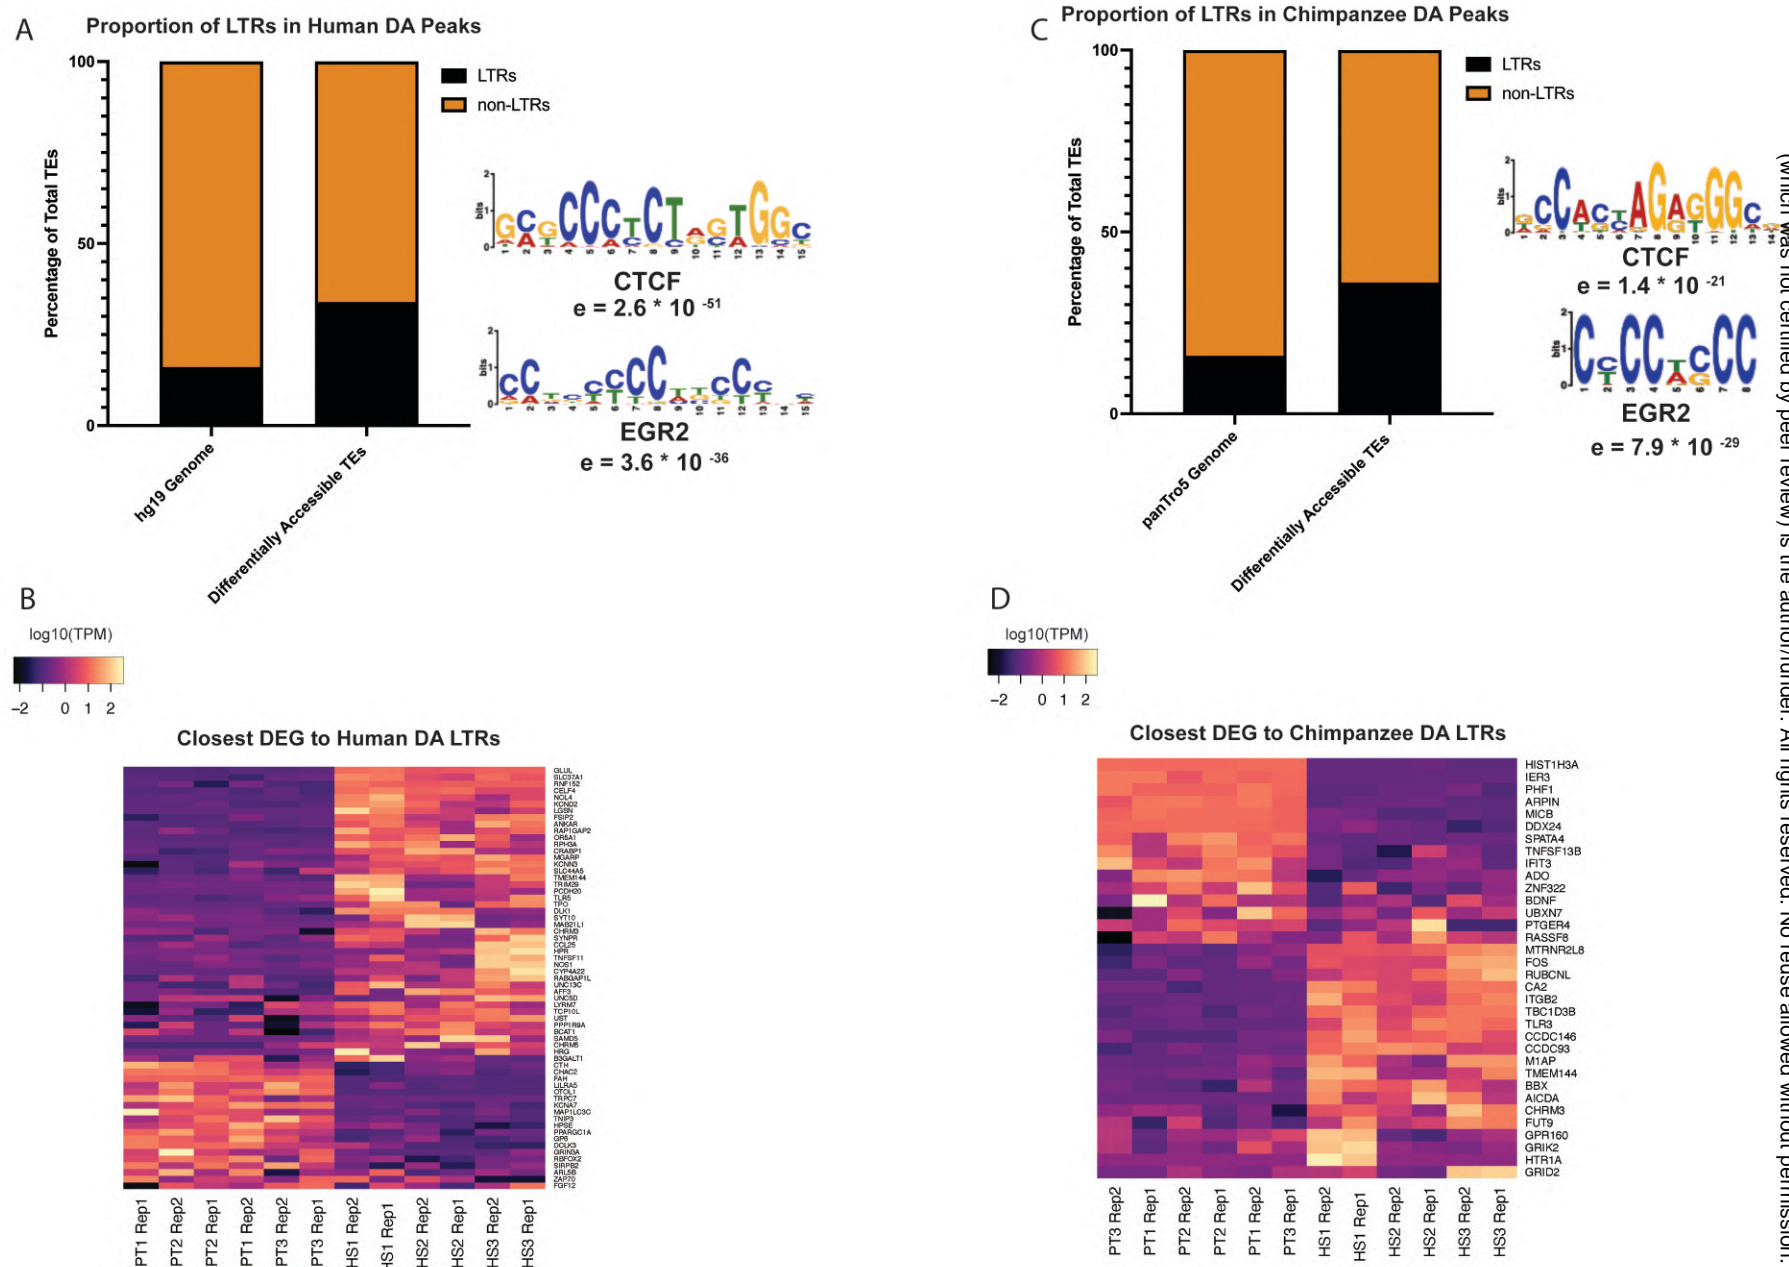

Figure 5 – LTRs Are Enriched Among Human and Chimpanzee Differentially Accessible Transposons. (A) Distribution of LTRs compared to non-LTRs in the human genome and in the 1,335 human TE-derived DA regions, with predicted binding motifs. (B) Differentially expressed genes close to the human-enriched DA LTRs. (C) Distribution of LTRs compared to non-LTRs in the chimpanzee genome and in the 1,410 chimpanzee TE-derived DA regions, with predicted binding motifs. (D) Differentially expressed genes close to the chimpanzee-enriched DA LTRs.

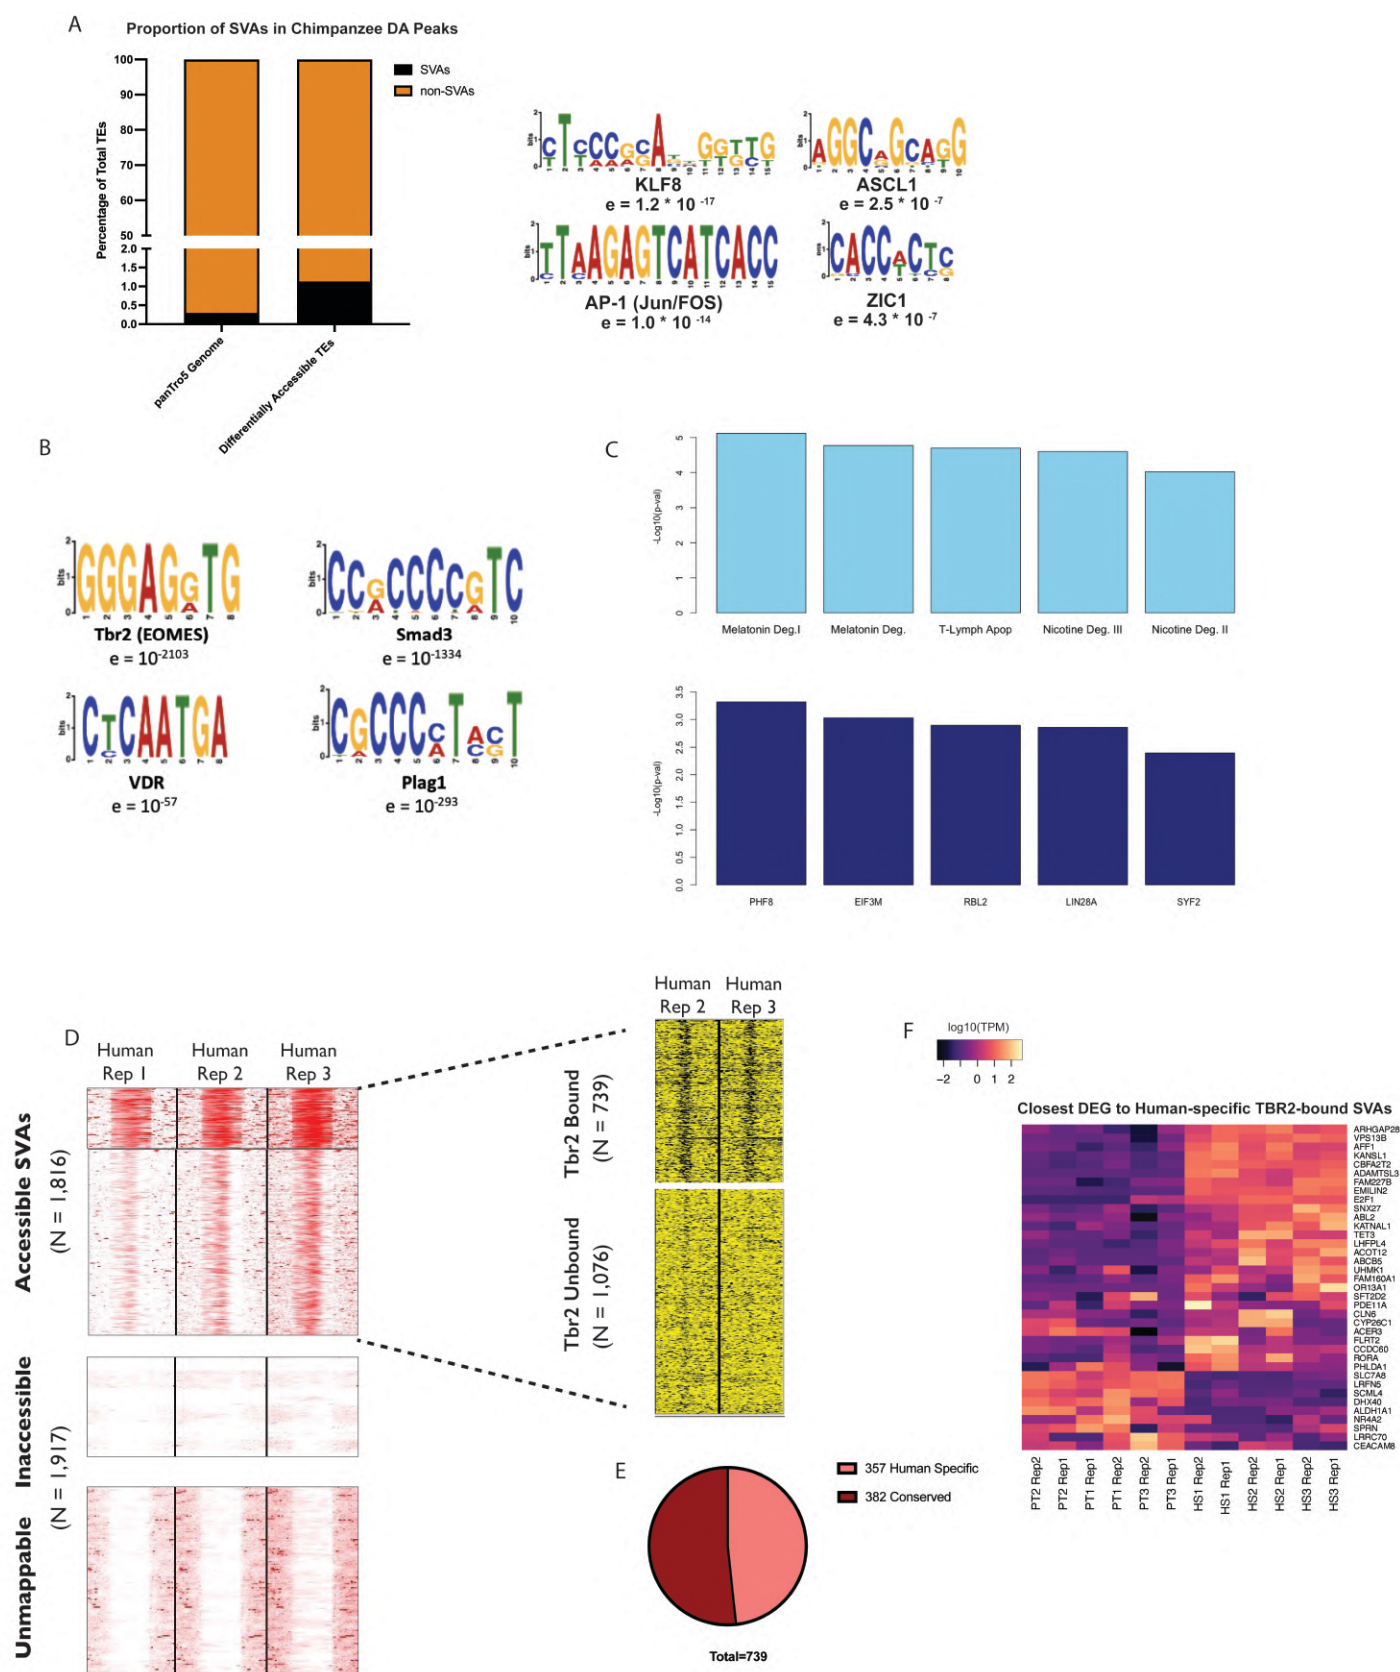

Figure 6 – Human-specific SVAs Bind Tbr2 and Influence Neurodevelopment (A) The SVAs enriched within the differentially accessible chimpanzee peaks are enriched for binding motifs of neurodevelopmental transcription factors KLF8, ZIC1, and ASCL1 as well as the AP-1 dimer. (B) Human SVAs are enriched for the binding motif of TBR2 (C) Genes proximal to human-specific SVAs are predicted to be regulated by neurodevelopmental TFs and function in important neuronal pathways (D) 1,816 human SVAs exhibit ATAC-seq signal in hIPCs (red = signal, white = noise) and of these, 739 exhibit TBR2 ChIP signal (black = signal, yellow = noise). (E) Breakdown of 739 accessible, TBR2 bound SVAs into “human-specific” and “conserved in chimpanzees”. (F) Differentially expressed genes close to the human-specific TBR2-bound SVAs.



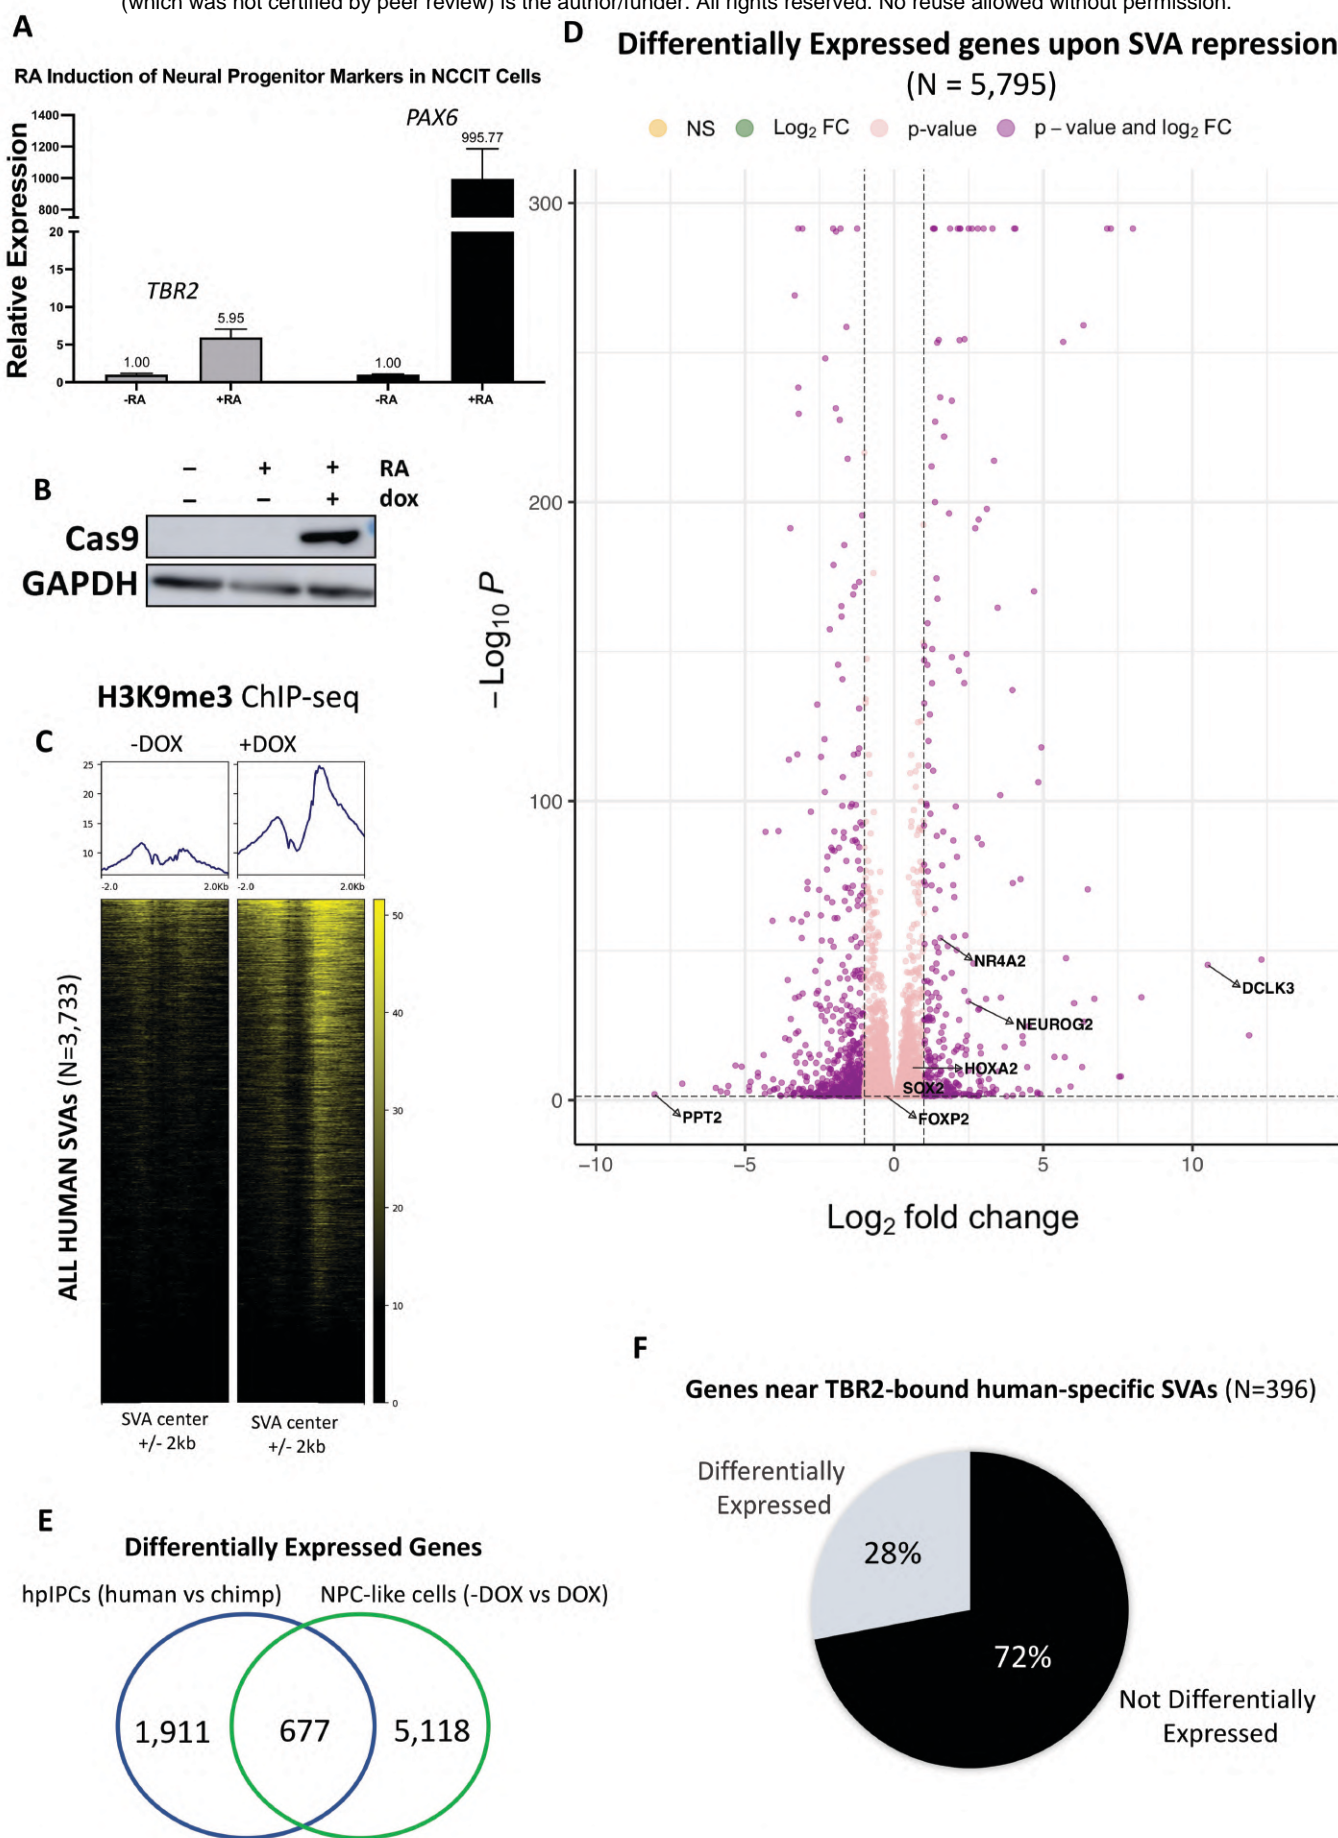

Figure 7 – CRISPR-interference on human SVAs. (A) Treating NCCITs with Retinoic Acid for 7 days leads to induction of TBR2 and PAX6, as shown in qRT-PCR. (B) Treating the RA-NCCIT stable CRISPR line for 72 hours with doxycycline leads to dCas9 activation, as shown in the Cas9 immunoblot. (C) dCas9 activation results in deposition of H3K9me3 at most human SVAs as shown in the H3K9me3 ChIP-seq heatmap (yellow = signal). (D) Volcano plot depicting genes differentially expressed upon doxycycline treatment. (E) Venn diagram showing overlap between genes differentially expressed between human and chimpanzee's hippocampal intermediate progenitors and between RA-NCCITs with and without doxycycline treatment (i.e. with and without SVA repression). (F) Pie chart illustrating the fraction of TBR2-controlled genes that are differentially expressed upon SVA repression in RA-NCCITs.
